# Supplementary material for: Discovery of Novel Plant Interaction Determinants from the Genomes of 163 Root Nodule Bacteria
Source: PubMed Central journal article supplement (PMC4653623; doi:10.1038/srep16825), 2015-11-20
Supplement: srep16825-s1.pdf [file srep16825-s1.pdf]

## **SUPPLEMENTARY TABLES**

### **Discovery of Novel Plant Interaction Determinants from the Genomes of 163 Root Nodule Bacteria**

Rekha Seshadri<sup>1</sup>, Wayne G. Reeve<sup>2</sup>, Julie K. Ardley<sup>2</sup>, Kristin Tennessen<sup>1</sup>, Tanja Woyke<sup>1</sup>, Nikos C. Kyrpides<sup>1</sup>  
and Natalia N. Ivanova<sup>1</sup>

<sup>1</sup>Department of Energy Joint Genome Institute, Walnut Creek, USA,

<sup>2</sup>Centre for Rhizobium Studies, School of Veterinary and Life Sciences, Murdoch University, Murdoch  
6150, Australia

Corresponding author: Rekha Seshadri, email: [rseshadri@lbl.gov](mailto:rseshadri@lbl.gov)

Supplementary Table 1. List of RNB strains analyzed in this study

| IMG taxon_oid | Genome Name                           | Genome Reference                                                                                                                                                                                                                                                                                                                          | Taxonomic Class     | Primary Plant Host Name | Isolation Country | Genome Size | Gene Count | GC % | CDS Count | Scaffold Count | Biome                                                        |
|---------------|---------------------------------------|-------------------------------------------------------------------------------------------------------------------------------------------------------------------------------------------------------------------------------------------------------------------------------------------------------------------------------------------|---------------------|-------------------------|-------------------|-------------|------------|------|-----------|----------------|--------------------------------------------------------------|
| 641228476     | Azorhizobium caulinodans ORS 571      | Dreyfus, B., Garcia, J. L. & Gillis, M. (1988). Characterization of Azorhizobium caulinodans gen. nov., sp. nov., a stem-nodulating nitrogen-fixing bacterium isolated from Sesbania rostrata. International Journal of Systematic Bacteriology 38, 89-98.                                                                                | Alphaproteobacteria | Sesbania rostrata       | Senegal           | 5369772     | 4781       | 0.67 | 4718      | 1              | Tropical and subtropical grasslands, savannas and shrublands |
| 2513237087    | Azorhizobium doebereineriae UFLA1-100 | this study                                                                                                                                                                                                                                                                                                                                | Alphaproteobacteria | Sesbania virgata        | Brazil            | 5817514     | 5415       | 0.69 | 5347      | 104            | Tropical and subtropical moist broadleaf forest              |
| 2513237145    | Bradyrhizobium elkanii USDA 3254      | this study                                                                                                                                                                                                                                                                                                                                | Alphaproteobacteria | Phaseolus acutifolius   | USA               | 8979722     | 8564       | 0.64 | 8487      | 85             | Deserts and xeric shrublands                                 |
| 2513237096    | Bradyrhizobium elkanii USDA 3259      | this study                                                                                                                                                                                                                                                                                                                                | Alphaproteobacteria | Phaseolus lunatus       | USA               | 8722461     | 8327       | 0.64 | 8253      | 101            | Temperate grasslands, savannas and grasslands                |
| 2517572143    | Bradyrhizobium elkanii USDA 76        | this study                                                                                                                                                                                                                                                                                                                                | Alphaproteobacteria | Glycine max             | USA               | 9484767     | 9151       | 0.64 | 9060      | 2              | Temperate broadleaf and mixed forests                        |
| 2513237137    | Bradyrhizobium elkanii USDA 94        | this study                                                                                                                                                                                                                                                                                                                                | Alphaproteobacteria | Glycine max             | USA               | 9558895     | 9129       | 0.64 | 9057      | 164            | Temperate broadleaf and mixed forests                        |
| 2513237101    | Bradyrhizobium elkanii WSM1741        | this study                                                                                                                                                                                                                                                                                                                                | Alphaproteobacteria | Rhynchosia minima       | Australia         | 7952346     | 7649       | 0.62 | 7581      | 69             | Deserts and xeric shrublands                                 |
| 2513237098    | Bradyrhizobium elkanii WSM2783        | this study                                                                                                                                                                                                                                                                                                                                | Alphaproteobacteria | Leobordia carinata      | South Africa      | 9902361     | 9734       | 0.62 | 9641      | 217            | Montane grasslands and shrublands                            |
| 2516653048    | Bradyrhizobium genosp. SA-4 CB756     | this study                                                                                                                                                                                                                                                                                                                                | Alphaproteobacteria | Macrotyloma africanum   | Zimbabwe          | 9826880     | 9456       | 0.64 | 9373      | 2              | Tropical and subtropical grasslands, savannas and shrublands |
| 637000038     | Bradyrhizobium japonicum USDA 110     | Kaneko T, Nakamura Y, Sato S, Minamisawa K, Uchiyumi T, Sasamoto S, Watanabe A, Idesawa K, Iriguchi M, Kawashima K, Kohara M, Matsumoto M, Shimpo S, Tsuruoka H, Wada T, Yamada M, Tabata S. (2002). Complete genomic sequence of nitrogen-fixing symbiotic bacterium Bradyrhizobium japonicum USDA110. DNA Research 9(6):189-97.         | Alphaproteobacteria | Glycine max             | USA               | 9105828     | 8402       | 0.64 | 8317      | 1              | Temperate grasslands, savannas and grasslands                |
| 2513237095    | Bradyrhizobium japonicum USDA 122     | this study                                                                                                                                                                                                                                                                                                                                | Alphaproteobacteria | Glycine max             | USA               | 8976980     | 8530       | 0.64 | 8451      | 101            | Temperate broadleaf and mixed forests                        |
| 2528768022    | Bradyrhizobium japonicum USDA 123     | this study                                                                                                                                                                                                                                                                                                                                | Alphaproteobacteria | Glycine max             | USA               | 1E+07       | 10573      | 0.63 | 10476     | 517            | Temperate grasslands, savannas and grasslands                |
| 2517093001    | Bradyrhizobium japonicum USDA 124     | this study                                                                                                                                                                                                                                                                                                                                | Alphaproteobacteria | Glycine max             | USA               | 9002274     | 8621       | 0.64 | 8509      | 123            | Temperate grasslands, savannas and grasslands                |
| 2513237102    | Bradyrhizobium japonicum USDA 135     | this study                                                                                                                                                                                                                                                                                                                                | Alphaproteobacteria | Glycine max             | USA               | 7703324     | 7923       | 0.64 | 7858      | 547            | Temperate grasslands, savannas and grasslands                |
| 2513237148    | Bradyrhizobium japonicum USDA 38      | this study                                                                                                                                                                                                                                                                                                                                | Alphaproteobacteria | Glycine max             | Japan             | 9608975     | 9258       | 0.64 | 9173      | 107            | Temperate broadleaf and mixed forests                        |
| 2513237139    | Bradyrhizobium japonicum USDA 4       | this study                                                                                                                                                                                                                                                                                                                                | Alphaproteobacteria | Glycine max             | USA               | 8737671     | 8243       | 0.64 | 8169      | 97             | Temperate grasslands, savannas and grasslands                |
| 2513237097    | Bradyrhizobium japonicum USDA 6       | this study                                                                                                                                                                                                                                                                                                                                | Alphaproteobacteria | Glycine max             | Japan             | 9131141     | 8736       | 0.64 | 8655      | 87             | Temperate broadleaf and mixed forests                        |
| 2511231207    | Bradyrhizobium japonicum USDA 6       | Kaneko T, Maita H, Hirakawa H, Uchiike N, Minamisawa K, Watanabe A, Sato S. Complete Genome Sequence of the Soybean Symbiont Bradyrhizobium japonicum Strain USDA6T. (2011). Genes (Basel). 2(4):763-87.                                                                                                                                  | Alphaproteobacteria | Glycine Max             | Japan             | 9207384     | 8886       | 0.64 | 8829      | 1              | Temperate broadleaf and mixed forests                        |
| 2524023210    | Bradyrhizobium sp. Ai1a-2             | this study                                                                                                                                                                                                                                                                                                                                | Alphaproteobacteria | Andira inermis          | Costa Rica        | 9029266     | 8584       | 0.63 | 8482      | 246            | Tropical and subtropical moist broadleaf forest              |
| 2508501128    | Bradyrhizobium sp. ARR65              | this study                                                                                                                                                                                                                                                                                                                                | Alphaproteobacteria | Stylosanthes viscosa    | Australia         | 8613869     | 8310       | 0.62 | 8246      | 139            | Tropical and subtropical grasslands, savannas and shrublands |
| 640427103     | Bradyrhizobium sp. BTAi1              | Giraud E, Moulin L, Vallet D, Barbe V, Cytryn E, et al. (2007) Legumes symbioses: absence of Nod genes in photosynthetic bradyrhizobia. Science 316: 1307-1312.                                                                                                                                                                           | Alphaproteobacteria | Aeschynomene indica     | USA               | 8493513     | 7819       | 0.65 | 7741      | 2              | Temperate grasslands, savannas and grasslands                |
| 2524023205    | Bradyrhizobium sp. Cp5.3              | this study                                                                                                                                                                                                                                                                                                                                | Alphaproteobacteria | Centrosema pubescens    | Panama            | 8918781     | 8545       | 0.63 | 8465      | 148            | Tropical and subtropical moist broadleaf forest              |
| 2513237104    | Bradyrhizobium sp. EC3.3              | this study                                                                                                                                                                                                                                                                                                                                | Alphaproteobacteria | Erythrina costaricensis | Panama            | 1E+07       | 9729       | 0.63 | 9656      | 154            | Tropical and subtropical moist broadleaf forest              |
| 2519103088    | Bradyrhizobium sp. ORS 375            | Mornico, D., Miché, L., Béna, G. & other authors (2011). Comparative genomics of Aeschynomene symbionts: insights into the ecological lifestyle of Nod-Independent photosynthetic bradyrhizobia. Genes 3, 35-61                                                                                                                           | Alphaproteobacteria | Aeschynomene sp.        | Senegal           | 7859468     | 7143       | 0.65 | 7078      | 497            | Tropical and subtropical grasslands, savannas and shrublands |
| 640427104     | Bradyrhizobium sp. ORS278             | Giraud E, Moulin L, Vallet D, Barbe V, Cytryn E, et al. (2007) Legumes symbioses: absence of Nod genes in photosynthetic bradyrhizobia. Science 316: 1307-1312.                                                                                                                                                                           | Alphaproteobacteria | Aeschynomene sensitiva  | Senegal           | 7456587     | 6825       | 0.66 | 6752      | 1              | Tropical and subtropical grasslands, savannas and shrublands |
| 2513237268    | Bradyrhizobium sp. ORS285             | Adeline Renier, Fabienne Maillet, Joel Fardoux, Véréna Poinot, Eric Giraud, and Nico Nouwen. Photosynthetic Bradyrhizobium Sp. Strain ORS285 Synthesizes 2-O-Methylfucosylated Lipochitooligosaccharides for nod Gene-Dependent Interaction with Aeschynomene Plants. (2012). Molecular Plant Microbe Interactions. Volume 24, Number 12. | Alphaproteobacteria | Aeschynomene afraspera  | Senegal           | 7602254     | 6842       | 0.65 | 6778      | 301            | Tropical and subtropical grasslands, savannas and shrublands |
| 2513237312    | Bradyrhizobium sp. STM 3809           | Damien Mornico, Lucie Miché, Gilles Béna, Nico Nouwen, André Verméglio, David Vallet, Alexander A.T. Smith, Eric Giraud, Claudine Médigue and Lionel Moulin. Comparative Genomics of Aeschynomene Symbionts: Insights into the Ecological Lifestyle of Nod-Independent Photosynthetic Bradyrhizobia. (2012). Genes 3, 35-61.              | Alphaproteobacteria | Aeschynomene sp.        | French Guiana     | 7311748     | 6699       | 0.66 | 6637      | 803            | Tropical and subtropical moist broadleaf forest              |
| 2524023228    | Bradyrhizobium sp. th.b2              | this study                                                                                                                                                                                                                                                                                                                                | Alphaproteobacteria | Amphicarpaea bracteata  | USA               | 1E+07       | 9917       | 0.63 | 9809      | 266            | Temperate broadleaf and mixed forests                        |
| 2513237141    | Bradyrhizobium sp. TV2a.2             | this study                                                                                                                                                                                                                                                                                                                                | Alphaproteobacteria | Tachigali versicolor    | Panama            | 8496279     | 8181       | 0.62 | 8109      | 87             | Tropical and subtropical moist broadleaf forest              |
| 2513237136    | Bradyrhizobium sp. USDA 3384          | this study                                                                                                                                                                                                                                                                                                                                | Alphaproteobacteria | Crotalaria paulina      | Brazil            | 9800269     | 9313       | 0.64 | 9240      | 51             | Tropical and subtropical grasslands, savannas and shrublands |
| 2508501042    | Bradyrhizobium sp. WSM1253            | this study                                                                                                                                                                                                                                                                                                                                | Alphaproteobacteria | Ornithopus compressus   | Greece            | 8719808     | 8498       | 0.63 | 8432      | 2              | Mediterranean forests, woodlands and scrub                   |
| 2507262055    | Bradyrhizobium sp. WSM1417            | this study                                                                                                                                                                                                                                                                                                                                | Alphaproteobacteria | Lupinus sp.             | Chile             | 8048963     | 7772       | 0.63 | 7695      | 1              | Mediterranean forests, woodlands and scrub                   |
| 2513237092    | Bradyrhizobium sp. WSM1743            | this study                                                                                                                                                                                                                                                                                                                                | Alphaproteobacteria | Indigofera sp.          | Australia         | 8341956     | 7983       | 0.63 | 7908      | 163            | Deserts and xeric shrublands                                 |
| 2513237153    | Bradyrhizobium sp. WSM2254            | this study                                                                                                                                                                                                                                                                                                                                | Alphaproteobacteria | Acacia sp.              | Australia         | 9086516     | 8597       | 0.64 | 8528      | 100            | Temperate broadleaf and mixed forests                        |
| 2513237161    | Bradyrhizobium sp. WSM2793            | this study                                                                                                                                                                                                                                                                                                                                | Alphaproteobacteria | Rhynchosia totta        | South Africa      | 8871253     | 8414       | 0.64 | 8349      | 84             | Montane grasslands and shrublands                            |
| 2513237094    | Bradyrhizobium sp. WSM3983            | this study                                                                                                                                                                                                                                                                                                                                | Alphaproteobacteria | Kennedia coccinea       | Australia         | 8789602     | 8469       | 0.63 | 8402      | 70             | Deserts and xeric shrublands                                 |
| 2515154112    | Bradyrhizobium sp. WSM4349            | this study                                                                                                                                                                                                                                                                                                                                | Alphaproteobacteria | Syrmatium glabrum       | USA               | 8294334     | 8114       | 0.63 | 8033      | 104            | Mediterranean forests, woodlands and scrub                   |
| 2508501009    | Bradyrhizobium sp. WSM471             | this study                                                                                                                                                                                                                                                                                                                                | Alphaproteobacteria | Ornithopus pinnatus     | Australia         | 7784016     | 7430       | 0.63 | 7372      | 1              | Mediterranean forests, woodlands and scrub                   |
| 2508501124    | Burkholderia diilworthii WSM3556      | this study                                                                                                                                                                                                                                                                                                                                | Betaproteobacteria  | Lebeckia ambigua        | South Africa      | 7679067     | 7123       | 0.62 | 7059      | 140            | Mediterranean forests, woodlands and scrub                   |
| 2513237083    | Burkholderia mimosarum LMG 23256      | this study                                                                                                                                                                                                                                                                                                                                | Betaproteobacteria  | Mimosa pigra            | Taiwan            | 8410967     | 7886       | 0.64 | 7801      | 268            | Tropical and subtropical moist broadleaf forest              |
| 2513237082    | Burkholderia mimosarum STM 3621       | this study                                                                                                                                                                                                                                                                                                                                | Betaproteobacteria  | Mimosa pudica           | French Guiana     | 8640282     | 8145       | 0.64 | 8062      | 268            | Tropical and subtropical moist broadleaf forest              |
| 2515154189    | Burkholderia nodosa DSM 21604         | unpublished                                                                                                                                                                                                                                                                                                                               | Betaproteobacteria  | Mimosa scabrella        | Brazil            | 9627966     | 8862       | 0.64 | 8777      | 114            | Deserts and xeric shrublands                                 |

|            |                                    |                                                                                                                                                                                                                                                                                                                                                                                                             |                     |                                |                  |         |      |      |      |     |                                                              |
|------------|------------------------------------|-------------------------------------------------------------------------------------------------------------------------------------------------------------------------------------------------------------------------------------------------------------------------------------------------------------------------------------------------------------------------------------------------------------|---------------------|--------------------------------|------------------|---------|------|------|------|-----|--------------------------------------------------------------|
| 2518645580 | Burkholderia phenoliruptrix BR3459 | de Oliveira Cunha C, Goda Zuleta LF, Paula de Almeida LG, Prioli Ciapina L, Lustrino Borges W, Pitard RM, Baldani JI, Stralioetto R, de Faria SM, Hungria M, Sousa Cavada B, Mercante FM, Ribeiro de Vasconcelos AT. Complete genome sequence of Burkholderia phenoliruptrix BR3459a (CLA1), a heat-tolerant, nitrogen-fixing symbiont of Mimosa flocculosa. (2012). J Bacteriol 194(23):6675-6             | Betaproteobacteria  | Mimosa flocculosa              | Brazil           | 7651131 | 6605 | 0.63 | 6525 | 3   | Deserts and xeric shrublands                                 |
| 642555112  | Burkholderia phymatum STM 815      | Moulin L, Klonowska A, Caroline B, Booth K, Vriezen JA, Melkonian R, James EK, Young JP, Bena G, Hauser L, Land M, Kyrpides N, Bruce D, Chain P, Copeland A, Pitluck S, Woyke T, Lizotte-Waniewski M, Bristow J, Riley M. Complete Genome sequence of Burkholderia phymatum STM815(T), a broad host range and efficient nitrogen-fixing symbiont of Mimosa species. (2014). Stand Genomic Sci. 9(3):763-74. | Betaproteobacteria  | Mimosa sp.                     | French Guiana    | 8676562 | 7574 | 0.62 | 7496 | 4   | Tropical and subtropical moist broadleaf forest              |
| 646564515  | Burkholderia sp. CCGE1002          | Ormeño-Orrillo E, Rogel MA, Chueire LM, Tiedje JM, Martínez-Romero E, Hungria M. Genome sequences of Burkholderia sp. strains CCGE1002 and H160, isolated from legume nodules in Mexico and Brazil. (2012). J Bacteriol. 194(24):6927.                                                                                                                                                                      | Betaproteobacteria  | Mimosa occidentalis            | Mexico           | 7884858 | 7358 | 0.63 | 7261 | 4   | Tropical and subtropical dry broadleaf forest                |
| 2515154122 | Burkholderia sp. JPY251            | this study                                                                                                                                                                                                                                                                                                                                                                                                  | Betaproteobacteria  | Mimosa velloziana              | Brazil           | 8609520 | 7983 | 0.63 | 7893 | 122 | Deserts and xeric shrublands                                 |
| 2526164713 | Burkholderia sp. JPY366            | this study                                                                                                                                                                                                                                                                                                                                                                                                  | Betaproteobacteria  | Mimosa misera                  | Brazil           | 6780608 | 6146 | 0.64 | 6070 | 69  | Deserts and xeric shrublands                                 |
| 2513237166 | Burkholderia sp. UYPR1.413         | this study                                                                                                                                                                                                                                                                                                                                                                                                  | Betaproteobacteria  | Parapiptadenia rigida (Angico) | Uruguay          | 1E+07   | 9836 | 0.62 | 9759 | 336 | Tropical and subtropical grasslands, savannas and shrublands |
| 2510065045 | Burkholderia sprentiae WSM5005     | this study                                                                                                                                                                                                                                                                                                                                                                                                  | Betaproteobacteria  | Lebeckia ambigua               | South Africa     | 7761063 | 7223 | 0.63 | 7147 | 8   | Mediterranean forests, woodlands and scrub                   |
| 2512047030 | Burkholderia tuberum STM 678       | Angus AA, Agapakis CM, Fong S, Yerrapragada S, Estrada-de los Santos P, Yang P, Song N, Kano S, Caballero-Mellado J, de Faria SM, Dakora FD, Weinstock G, Hirsch AM. Plant-associated symbiotic Burkholderia species lack hallmark strategies required in mammalian pathogenesis. (2014). PLoS One. 9(1):e83779.                                                                                            | Betaproteobacteria  | Cyclopia sp.                   | South Africa     | 9031815 | 8658 | 0.63 | 8534 | 284 | Mediterranean forests, woodlands and scrub                   |
| 2516653074 | Burkholderia tuberum WSM4176       | this study                                                                                                                                                                                                                                                                                                                                                                                                  | Betaproteobacteria  | Lebeckia ambigua               | South Africa     | 9065247 | 8497 | 0.63 | 8369 | 13  | Mediterranean forests, woodlands and scrub                   |
| 2524023212 | Cupriavidus sp. AMP6               | this study                                                                                                                                                                                                                                                                                                                                                                                                  | Betaproteobacteria  | Mimosa asperata                | USA              | 7579563 | 7130 | 0.65 | 7033 | 260 | Deserts and xeric shrublands                                 |
| 2513237163 | Cupriavidus sp. UYPR2.512          | this study                                                                                                                                                                                                                                                                                                                                                                                                  | Betaproteobacteria  | Parapiptadenia rigida          | Uruguay          | 7858949 | 7487 | 0.65 | 7411 | 365 | Tropical and subtropical grasslands, savannas and shrublands |
| 644736347  | Cupriavidus taiwanensis LMG 19424  | Amadou C, Pascal G, Mangenot S, Glew M, Bontemps C, Capela D, Carrère S, Cruveiller S, Dossat C, Lajus A, Marchetti M, Poinot V, Rouy Z, Servin B, Saad M, Schenowitz C, Barbe V, Batut J, Médigue C, Masson-Boivin C. Genome sequence of the beta-rhizobium Cupriavidus taiwanensis and comparative genomics of rhizobia. (2008). Genome Res. 18(9):1472-83                                                | Betaproteobacteria  | Mimosa pudica                  | Taiwan           | 6476522 | 5986 | 0.67 | 5897 | 3   | Tropical and subtropical moist broadleaf forest              |
| 2513237150 | Cupriavidus taiwanensis STM 6018   | this study                                                                                                                                                                                                                                                                                                                                                                                                  | Betaproteobacteria  | Mimosa pudica                  | French Guiana    | 6553639 | 5925 | 0.67 | 5864 | 80  | Tropical and subtropical moist broadleaf forest              |
| 2513237165 | Cupriavidus taiwanensis STM 6070   | this study                                                                                                                                                                                                                                                                                                                                                                                                  | Betaproteobacteria  | Mimosa pudica                  | New Caledonia    | 6771773 | 6182 | 0.67 | 6118 | 107 | Tropical and subtropical moist broadleaf forest              |
| 2512047086 | Ensifer arboris LMG 14919          | this study                                                                                                                                                                                                                                                                                                                                                                                                  | Alphaproteobacteria | Prosopis chilensis             | Sudan            | 6850303 | 6545 | 0.62 | 6461 | 7   | Tropical and subtropical grasslands, savannas and shrublands |
| 2547132261 | Ensifer fredii GR64                | Torres Tejerizo G, Lozano L, González V, Bustos P, Romero D, Brom S. Draft genome sequence of the bean-nodulating Sinorhizobium fredii strain GR64. (2012). J Bacteriol. 194(24):6978.                                                                                                                                                                                                                      | Alphaproteobacteria | Phaseolus vulgaris             | Spain            | 6959392 | 6630 | 0.62 | 6551 | 216 | Mediterranean forests, woodlands and scrub                   |
| 2517572023 | Ensifer fredii HH103               | Weidner S, Becker A, Bonilla I, Jaenicke S, Lloret J, Margaret I, Pühler A, Ruiz-Sainz JE, Schneiker-Bekel S, Szczepanowski R, Vinardell JM, Zehner S, Göttfert M. Genome sequence of the soybean symbiont Sinorhizobium fredii HH103. (2012). J Bacteriol. 2012 194(6):1617-8.                                                                                                                             | Alphaproteobacteria | Glycine max                    | China            | 7221188 | 6851 | 0.62 | 6789 | 10  | Tropical and subtropical moist broadleaf forest              |
| 643692032  | Ensifer fredii NGR234              | Schmeisser, C., Liesegang, H., Kryciak, D. & other authors (2009). Rhizobium sp strain NGR234 possesses a remarkable number of secretion systems. Applied and Environmental Microbiology 75, 4035-4045                                                                                                                                                                                                      | Alphaproteobacteria | Lablab purpureus               | Papua New Guinea | 6891900 | 6437 | 0.62 | 6376 | 3   | Tropical and subtropical moist broadleaf forest              |
| 2514885035 | Ensifer fredii USDA 257            | Schuldes J, Rodriguez Orbegoso M, Schmeisser C, Krishnan HB, Daniel R, Streit WR. Complete genome sequence of the broad-host-range strain Sinorhizobium fredii USDA257. (2012). J Bacteriol. 194(16):4483.                                                                                                                                                                                                  | Alphaproteobacteria | Glycine soja                   | China            | 7032323 | 6855 | 0.62 | 6793 | 20  | Temperate broadleaf and mixed forests                        |
| 2513237089 | Ensifer medicae Di28               | this study                                                                                                                                                                                                                                                                                                                                                                                                  | Alphaproteobacteria | Medicago arabica               | Sardinia         | 6553624 | 6469 | 0.61 | 6394 | 104 | Mediterranean forests, woodlands and scrub                   |
| 2512875026 | Ensifer medicae WSM1115            | this study                                                                                                                                                                                                                                                                                                                                                                                                  | Alphaproteobacteria | Medicago polymorpha            | Greece           | 6861065 | 6872 | 0.61 | 6789 | 7   | Mediterranean forests, woodlands and scrub                   |
| 2513237156 | Ensifer medicae WSM1369            | this study                                                                                                                                                                                                                                                                                                                                                                                                  | Alphaproteobacteria | Medicago sphaerocarpos         | Sardinia         | 6402557 | 6735 | 0.61 | 6656 | 307 | Mediterranean forests, woodlands and scrub                   |
| 2513237160 | Ensifer medicae WSM244             | this study                                                                                                                                                                                                                                                                                                                                                                                                  | Alphaproteobacteria | Medicago polymorpha            | Iraq             | 6650282 | 6495 | 0.61 | 6427 | 91  | Temperate grasslands, savannas and grasslands                |
| 640753051  | Ensifer medicae WSM419             | this study                                                                                                                                                                                                                                                                                                                                                                                                  | Alphaproteobacteria | Medicago murex                 | Sardinia         | 6817576 | 6599 | 0.61 | 6518 | 4   | Mediterranean forests, woodlands and scrub                   |
| 2517487022 | Ensifer medicae WSM4191            | this study                                                                                                                                                                                                                                                                                                                                                                                                  | Alphaproteobacteria | Melilotus siculus              | Australia        | 7227575 | 7099 | 0.61 | 7010 | 6   | Mediterranean forests, woodlands and scrub                   |
| 637000269  | Ensifer meliloti 1021              | Galibert, F., Finan, T. M., Long, S. R. & other authors (2001). The composite genome of the legume symbiont Sinorhizobium meliloti. Science 293, 668-672                                                                                                                                                                                                                                                    | Alphaproteobacteria | Medicago sativa                | Australia        | 6691694 | 6295 | 0.62 | 6212 | 3   | Temperate broadleaf and mixed forests                        |
| 2551306089 | Ensifer meliloti 1A42              | unpublished                                                                                                                                                                                                                                                                                                                                                                                                 | Alphaproteobacteria | Medicago sativa                | Iran             | 7162724 | 7454 | 0.62 | 7360 | 315 | Deserts and xeric shrublands                                 |
| 2562617130 | Ensifer meliloti 2011              | Sallet E, Roux B, Sauviac L, Jardinaud MF, Carrère S, Faraut T, de Carvalho-Niebel F, Gouzy J, Gamas P, Capela D, Bruand C (2013) Next-generation annotation of prokaryotic genomes with EuGene-P: application to Sinorhizobium meliloti 2011 DNA Res. 20(4):339-54                                                                                                                                         | Alphaproteobacteria | Medicago sativa                | Australia        | 6693185 | 8251 | 0.62 | 6312 | 3   | Temperate broadleaf and mixed forests                        |
| 2515154107 | Ensifer meliloti 4H41              | this study                                                                                                                                                                                                                                                                                                                                                                                                  | Alphaproteobacteria | Phaseolus vulgaris             | Tunisia          | 6795637 | 6422 | 0.62 | 6350 | 47  | Deserts and xeric shrublands                                 |
| 2551306084 | Ensifer meliloti 5A14              | unpublished                                                                                                                                                                                                                                                                                                                                                                                                 | Alphaproteobacteria | Medicago sativa                | Iran             | 8942552 | 8870 | 0.62 | 8728 | 217 | Deserts and xeric shrublands                                 |
| 2551306090 | Ensifer meliloti A0641M            | unpublished                                                                                                                                                                                                                                                                                                                                                                                                 | Alphaproteobacteria | Medicago sativa                | Italy            | 7953713 | 8520 | 0.62 | 8412 | 451 | Mediterranean forests, woodlands and scrub                   |

|            |                                   |                                                                                                                                                                                                                                                                                                                                                                                                                                                                                                                |                     |                       |                |         |      |      |      |     |                                                 |
|------------|-----------------------------------|----------------------------------------------------------------------------------------------------------------------------------------------------------------------------------------------------------------------------------------------------------------------------------------------------------------------------------------------------------------------------------------------------------------------------------------------------------------------------------------------------------------|---------------------|-----------------------|----------------|---------|------|------|------|-----|-------------------------------------------------|
| 2551306087 | Ensifer meliloti A0643DD          | unpublished                                                                                                                                                                                                                                                                                                                                                                                                                                                                                                    | Alphaproteobacteria | Medicago sativa       | Italy          | 7351905 | 7849 | 0.62 | 7755 | 678 | Mediterranean forests, woodlands and scrub      |
| 2551306085 | Ensifer meliloti AE608H           | unpublished                                                                                                                                                                                                                                                                                                                                                                                                                                                                                                    | Alphaproteobacteria | Medicago sativa       | Italy          | 7347181 | 7285 | 0.62 | 7181 | 223 | Mediterranean forests, woodlands and scrub      |
| 2551306086 | Ensifer meliloti AK11             | unpublished                                                                                                                                                                                                                                                                                                                                                                                                                                                                                                    | Alphaproteobacteria | Medicago falcata      | Kazakhstan     | 6843938 | 6988 | 0.62 | 6902 | 424 | Temperate grasslands, savannas and grasslands   |
| 2511231052 | Ensifer meliloti AK58             | Galardini M, Bazzicalupo M, Biondi E, Brambilla E, Brilli M, Bruce D, Chain P, Chen A, Daligault H, Davenport KW, Deshpande S, Detter JC, Goodwin LA, Han C, Han J, Huntemann M, Ivanova N, Klenk HP, Kyrpides NC, Markowitz V, Mavrommatis K, Mocali S, Nolan M, Pagani I, Pati A, Pini F, Pitluck S, Spini G, Szeto E, Teshima H, Woyke T, Mengoni A. Permanent draft genome sequences of the symbiotic nitrogen fixing Ensifer meliloti strains BO21CC and AK58. (2013). Stand Genomic Sci. 15;9(2):325-33. | Alphaproteobacteria | Medicago falcata      | Kazakhstan     | 6974333 | 7013 | 0.62 | 6934 | 9   | Temperate grasslands, savannas and grasslands   |
| 2551306092 | Ensifer meliloti AK75             | unpublished                                                                                                                                                                                                                                                                                                                                                                                                                                                                                                    | Alphaproteobacteria | Medicago lupulina     | Kazakhstan     | 6992595 | 7636 | 0.62 | 7550 | 700 | Temperate grasslands, savannas and grasslands   |
| 650716086  | Ensifer meliloti AK83             | Galardini et al. (2011) Exploring the symbiotic pangenome of the nitrogen-fixing bacterium Sinorhizobium meliloti BMC Genomics, 12:235                                                                                                                                                                                                                                                                                                                                                                         | Alphaproteobacteria | Medicago falcata      | Kazakhstan     | 7140471 | 7022 | 0.62 | 6954 | 5   | Temperate grasslands, savannas and grasslands   |
| 648276728  | Ensifer meliloti BL225C           | Galardini et al. (2011) Exploring the symbiotic pangenome of the nitrogen-fixing bacterium Sinorhizobium meliloti BMC Genomics, 12:237                                                                                                                                                                                                                                                                                                                                                                         | Alphaproteobacteria | Medicago sativa       | Italy          | 6968865 | 6769 | 0.62 | 6712 | 158 | Mediterranean forests, woodlands and scrub      |
| 2516653046 | Ensifer meliloti BO21CC           | Galardini M, Bazzicalupo M, Biondi E, Brambilla E, Brilli M, Bruce D, Chain P, Chen A, Daligault H, Davenport KW, Deshpande S, Detter JC, Goodwin LA, Han C, Han J, Huntemann M, Ivanova N, Klenk HP, Kyrpides NC, Markowitz V, Mavrommatis K, Mocali S, Nolan M, Pagani I, Pati A, Pini F, Pitluck S, Spini G, Szeto E, Teshima H, Woyke T, Mengoni A. Permanent draft genome sequences of the symbiotic nitrogen fixing Ensifer meliloti strains BO21CC and AK58. (2013). Stand Genomic Sci. 15;9(2):325-33. | Alphaproteobacteria | Medicago sativa       | Italy          | 6989037 | 6907 | 0.62 | 6805 | 3   | Mediterranean forests, woodlands and scrub      |
| 2551306091 | Ensifer meliloti C0431A           | unpublished                                                                                                                                                                                                                                                                                                                                                                                                                                                                                                    | Alphaproteobacteria | Medicago sativa       | Italy          | 7086830 | 7449 | 0.62 | 7373 | 401 | Mediterranean forests, woodlands and scrub      |
| 2551306093 | Ensifer meliloti C0438LL          | unpublished                                                                                                                                                                                                                                                                                                                                                                                                                                                                                                    | Alphaproteobacteria | Medicago sativa       | Italy          | 7064773 | 7332 | 0.62 | 7237 | 492 | Mediterranean forests, woodlands and scrub      |
| 2519103084 | Ensifer meliloti CCNWSX0020       | Li Z, Ma Z, Hao X, Wei G. Draft genome sequence of Sinorhizobium meliloti CCNWSX0020, a nitrogen-fixing symbiont with copper tolerance capability isolated from lead-zinc mine tailings. (2012). J Bacteriol. 194(5):1267-8.                                                                                                                                                                                                                                                                                   | Alphaproteobacteria | Medicago lupulina     | China          | 7001588 | 6900 | 0.62 | 6847 | 233 |                                                 |
| 2510065056 | Ensifer meliloti CIAM1775         | this study                                                                                                                                                                                                                                                                                                                                                                                                                                                                                                     | Alphaproteobacteria | Medicago lupulina     | Kazakhstan     | 6712855 | 6516 | 0.62 | 6440 | 108 | Temperate grasslands, savannas and grasslands   |
| 2523533632 | Ensifer meliloti GR4              | Martínez-Abarca F, Martínez-Rodríguez L, López-Contreras JA, Jiménez-Zurdo JI, Toro N. Complete Genome Sequence of the Alfalfa Symbiont Sinorhizobium/Ensifer meliloti Strain GR4. (2013). Genome Announc. 1(1). pii: e00174-12.                                                                                                                                                                                                                                                                               | Alphaproteobacteria | Medicago sativa       | Spain          | 7139558 | 6826 | 0.62 | 6707 | 5   | Mediterranean forests, woodlands and scrub      |
| 2513237140 | Ensifer meliloti GVPV12           | this study                                                                                                                                                                                                                                                                                                                                                                                                                                                                                                     | Alphaproteobacteria | Phaseolus vulgaris    | Canary Islands | 7076289 | 6806 | 0.62 | 6727 | 106 | Mediterranean forests, woodlands and scrub      |
| 2551306148 | Ensifer meliloti H1               | unpublished                                                                                                                                                                                                                                                                                                                                                                                                                                                                                                    | Alphaproteobacteria | Medicago sativa       | Italy          | 6923151 | 7084 | 0.62 | 6990 | 397 | Mediterranean forests, woodlands and scrub      |
| 2513237143 | Ensifer meliloti Mlalz-1          | this study                                                                                                                                                                                                                                                                                                                                                                                                                                                                                                     | Alphaproteobacteria | Medicago laciniata    | Canary Islands | 6664116 | 6388 | 0.62 | 6314 | 99  | Mediterranean forests, woodlands and scrub      |
| 2513237086 | Ensifer meliloti MVII-I           | this study                                                                                                                                                                                                                                                                                                                                                                                                                                                                                                     | Alphaproteobacteria | Medicago sativa       | Germany        | 7265287 | 7213 | 0.62 | 7133 | 220 | Temperate broadleaf and mixed forests           |
| 2513237091 | Ensifer meliloti RRI128           | this study                                                                                                                                                                                                                                                                                                                                                                                                                                                                                                     | Alphaproteobacteria | Medicago truncatula   | Australia      | 6900273 | 6770 | 0.62 | 6683 | 156 | Mediterranean forests, woodlands and scrub      |
| 651053067  | Ensifer meliloti SM11             | Schneiker-Bekel S, Wibberg D, Bekel T, Blom J, Linke B, Neuweiger H, Stiens M, Vorhölder FJ, Weidner S, Goesmann A, Pühler A, Schlüter A. The complete genome sequence of the dominant Sinorhizobium meliloti field isolate SM11 extends the S. meliloti pan-genome. (2011). J Biotechnol. 155(1):20-33.                                                                                                                                                                                                       | Alphaproteobacteria | Medicago sativa       | Germany        | 7173736 | 7156 | 0.62 | 7093 | 3   | Temperate coniferous forests                    |
| 2510065057 | Ensifer meliloti WSM1022          | this study                                                                                                                                                                                                                                                                                                                                                                                                                                                                                                     | Alphaproteobacteria | Medicago orbicularis  | Greece         | 6649661 | 6398 | 0.62 | 6323 | 121 | Mediterranean forests, woodlands and scrub      |
| 2516143018 | Ensifer sp. BR816                 | this study                                                                                                                                                                                                                                                                                                                                                                                                                                                                                                     | Alphaproteobacteria | Leucaena leucocephala | Brazil         | 6951533 | 6643 | 0.62 | 6554 | 3   | Tropical and subtropical moist broadleaf forest |
| 2509276019 | Ensifer sp. TW10                  | this study                                                                                                                                                                                                                                                                                                                                                                                                                                                                                                     | Alphaproteobacteria | Tephrosia wallichii   | India          | 6802256 | 6546 | 0.62 | 6473 | 57  | Deserts and xeric shrublands                    |
| 2524023207 | Ensifer sp. USDA 6670, CC2017     | this study                                                                                                                                                                                                                                                                                                                                                                                                                                                                                                     | Alphaproteobacteria | Medicago sativa       | Australia      | 6813453 | 6547 | 0.62 | 6465 | 73  | Temperate grasslands, savannas and grasslands   |
| 2508501122 | Ensifer sp. WSM1721               | this study                                                                                                                                                                                                                                                                                                                                                                                                                                                                                                     | Alphaproteobacteria | Indigofera sp.        | Australia      | 6292184 | 6011 | 0.62 | 5935 | 68  | Deserts and xeric shrublands                    |
| 2513237351 | Mesorhizobium alhagi CCNWXJ12-2   | Zhou, M., Chen, W., Chen, H. & Wei, G. (2012). Draft genome sequence of Mesorhizobium alhagi CCNWXJ12-2T, a novel salt-resistant species isolated from the desert of Northwestern China. Journal of Bacteriology 194, 1261-1262                                                                                                                                                                                                                                                                                | Alphaproteobacteria | Alhagi sparsifolia    | China          | 6968952 | 7244 | 0.63 | 7195 | 375 | Deserts and xeric shrublands                    |
| 2513237305 | Mesorhizobium amorphae CCNWSG0123 | Hao X, Lin Y, Johnstone L, Baltrus DA, Miller SJ, Wei G, Rensing C. Draft genome sequence of plant growth-promoting rhizobium Mesorhizobium amorphae, isolated from zinc-lead mine tailings. (2012). J Bacteriol. 194(3):736-7.                                                                                                                                                                                                                                                                                | Alphaproteobacteria | Robinia pseudoacacia  | China          | 7293571 | 7136 | 0.63 | 7084 | 274 | Temperate broadleaf and mixed forests           |
| 2509276022 | Mesorhizobium australicum WSM2073 | this study                                                                                                                                                                                                                                                                                                                                                                                                                                                                                                     | Alphaproteobacteria | Biserrula pelecinus   | Australia      | 6200534 | 6080 | 0.63 | 6013 | 1   | Mediterranean forests, woodlands and scrub      |
| 2509276018 | Mesorhizobium ciceri CMG6         | this study                                                                                                                                                                                                                                                                                                                                                                                                                                                                                                     | Alphaproteobacteria | Cicer arietinum       | Tunisia        | 6910194 | 6718 | 0.62 | 6648 | 90  | Mediterranean forests, woodlands and scrub      |
| 649633066  | Mesorhizobium ciceri WSM1271      | this study                                                                                                                                                                                                                                                                                                                                                                                                                                                                                                     | Alphaproteobacteria | Biserrula pelecinus   | Sardinia       | 6690028 | 6531 | 0.63 | 6470 | 2   | Mediterranean forests, woodlands and scrub      |
| 2510065059 | Mesorhizobium ciceri WSM4083      | this study                                                                                                                                                                                                                                                                                                                                                                                                                                                                                                     | Alphaproteobacteria | Bituminaria bitumosa  | Canary Islands | 6847884 | 6662 | 0.63 | 6596 | 42  | Mediterranean forests, woodlands and scrub      |
| 2513237164 | Mesorhizobium loti CJ3sym         | this study                                                                                                                                                                                                                                                                                                                                                                                                                                                                                                     | Alphaproteobacteria | Lotus corniculatus    | New Zealand    | 7563725 | 7401 | 0.62 | 7331 | 70  | Temperate grasslands, savannas and grasslands   |
| 637000159  | Mesorhizobium loti MAFF303099     | Kaneko T, Nakamura Y, Sato S, Asamizu E, Kato T, Sasamoto S, Watanabe A, Idesawa K, Ishikawa A, Kawashima K, Kimura T, Kishida Y, Kiyokawa C, Kohara M, Matsumoto M, Matsuno A, Mochizuki Y, Nakayama S, Nakazaki N, Shimpo S, Sugimoto M, Takeuchi C, Yamada M, Tabata S. Complete genome structure of the nitrogen-fixing symbiotic bacterium Mesorhizobium loti. (2000). DNA Res. 7(6):331-8.                                                                                                               | Alphaproteobacteria | Lotus corniculatus    | Japan          | 7596297 | 7356 | 0.63 | 7272 | 3   | Temperate broadleaf and mixed forests           |
| 2517572076 | Mesorhizobium loti NZP2037        | this study                                                                                                                                                                                                                                                                                                                                                                                                                                                                                                     | Alphaproteobacteria | Lotus divaricatus     | New Zealand    | 7462792 | 7388 | 0.63 | 7318 | 1   | Temperate broadleaf and mixed forests           |

|            |                                             |                                                                                                                                                                                                                                                                                                                                                                                                                                                                                                   |                     |                         |                |         |       |      |       |     |                                                              |
|------------|---------------------------------------------|---------------------------------------------------------------------------------------------------------------------------------------------------------------------------------------------------------------------------------------------------------------------------------------------------------------------------------------------------------------------------------------------------------------------------------------------------------------------------------------------------|---------------------|-------------------------|----------------|---------|-------|------|-------|-----|--------------------------------------------------------------|
| 2512875016 | Mesorhizobium loti R7A                      | this study                                                                                                                                                                                                                                                                                                                                                                                                                                                                                        | Alphaproteobacteria | Lotus corniculatus      | New Zealand    | 6529530 | 6398  | 0.63 | 6323  | 1   | Temperate broadleaf and mixed forests                        |
| 2512875024 | Mesorhizobium loti R88b                     | this study                                                                                                                                                                                                                                                                                                                                                                                                                                                                                        | Alphaproteobacteria | Lotus corniculatus      | New Zealand    | 7195110 | 7016  | 0.62 | 6950  | 1   | Temperate broadleaf and mixed forests                        |
| 2513237147 | Mesorhizobium loti USDA 3471                | this study                                                                                                                                                                                                                                                                                                                                                                                                                                                                                        | Alphaproteobacteria | Lotus corniculatus      | New Zealand    | 7023073 | 6785  | 0.63 | 6714  | 50  | Temperate broadleaf and mixed forests                        |
| 2503198000 | Mesorhizobium opportunistum WSM2075         | this study                                                                                                                                                                                                                                                                                                                                                                                                                                                                                        | Alphaproteobacteria | Biserrula pelecinus     | Australia      | 6884444 | 6747  | 0.63 | 6685  | 1   | Mediterranean forests, woodlands and scrub                   |
| 2508501126 | Mesorhizobium sp. WSM1293                   | this study                                                                                                                                                                                                                                                                                                                                                                                                                                                                                        | Alphaproteobacteria | Lotus ornithopodioides  | Greece         | 6938611 | 6711  | 0.62 | 6640  | 51  | Mediterranean forests, woodlands and scrub                   |
| 2508501127 | Mesorhizobium sp. WSM2561                   | this study                                                                                                                                                                                                                                                                                                                                                                                                                                                                                        | Alphaproteobacteria | Lessertia diffusa       | South Africa   | 7037543 | 6910  | 0.62 | 6834  | 111 | Mediterranean forests, woodlands and scrub                   |
| 2513237090 | Mesorhizobium sp. WSM3224                   | this study                                                                                                                                                                                                                                                                                                                                                                                                                                                                                        | Alphaproteobacteria | Otholobium candicans    | South Africa   | 7096802 | 6951  | 0.63 | 6880  | 72  | Mediterranean forests, woodlands and scrub                   |
| 2508501123 | Mesorhizobium sp. WSM3626                   | this study                                                                                                                                                                                                                                                                                                                                                                                                                                                                                        | Alphaproteobacteria | Lessertia diffusa       | South Africa   | 6283661 | 6243  | 0.63 | 6172  | 106 | Deserts and xeric shrublands                                 |
| 643348564  | Methylobacterium nodulans ORS 2060          | Marx, C. J., Bringel, F., Chistoserdova, L. et. Al. (2012). Complete genome sequences of six strains of the genus Methylobacterium. Journal of Bacteriology 194, 4746-4748                                                                                                                                                                                                                                                                                                                        | Alphaproteobacteria | Crotalaria podocarpa    | Senegal        | 8839022 | 8885  | 0.68 | 8791  | 8   | Tropical and subtropical grasslands, savannas and shrublands |
| 641522639  | Methylobacterium sp. 4-46                   | Marx, C. J., Bringel, F., Chistoserdova, L. et. Al. (2012). Complete genome sequences of six strains of the genus Methylobacterium. Journal of Bacteriology 194, 4746-4748                                                                                                                                                                                                                                                                                                                        | Alphaproteobacteria | Listia bainesii         | South Africa   | 7737025 | 7125  | 0.72 | 7043  | 3   |                                                              |
| 254555834  | Methylobacterium sp. WSM2598                | this study                                                                                                                                                                                                                                                                                                                                                                                                                                                                                        | Alphaproteobacteria | Listia bainesii         | South Africa   | 8130841 | 7667  | 0.71 | 7551  | 85  | Montane grasslands and shrublands                            |
| 2508501114 | Microvirga lotononidis WSM3557              | this study                                                                                                                                                                                                                                                                                                                                                                                                                                                                                        | Alphaproteobacteria | Listia angolensis       | Zambia         | 7082538 | 7040  | 0.63 | 6956  | 18  | Flooded grasslands and savannas                              |
| 2508501050 | Microvirga lupini Lut6                      | this study                                                                                                                                                                                                                                                                                                                                                                                                                                                                                        | Alphaproteobacteria | Lupinus texensis        | USA            | 9633614 | 10951 | 0.62 | 10864 | 160 | Temperate grasslands, savannas and grasslands                |
| 640427137  | Rhizobium etli CFN 42, DSM 11541            | González, V., Santamaría, R. I., Bustos, P. & other authors (2006). The partitioned Rhizobium etli genome: Genetic and metabolic redundancy in seven interacting replicons. Proceedings of the National Academy of Sciences 103, 3834-3839                                                                                                                                                                                                                                                        | Alphaproteobacteria | Phaseolus vulgaris      | Mexico         | 6530228 | 6117  | 0.61 | 6038  | 7   | Tropical and subtropical dry broadleaf forest                |
| 642555152  | Rhizobium etli CIAT 652                     | unpublished                                                                                                                                                                                                                                                                                                                                                                                                                                                                                       | Alphaproteobacteria | Phaseolus vulgaris      | Colombia       | 6448048 | 6132  | 0.61 | 6072  | 4   | Tropical and subtropical dry broadleaf forest                |
| 2529292711 | Rhizobium etli CNPAF512                     | Maarten Fauvert, Aminael Sánchez-Rodríguez, Serge Beullens, Kathleen Marchal, and Jan Michiels. Genome Sequence of Rhizobium etli CNPAF512, a Nitrogen-Fixing Symbiont Isolated from Bean Root Nodules in Brazil. (2011). J Bacteriol. 193(12): 3158-3159.                                                                                                                                                                                                                                        | Alphaproteobacteria | Phaseolus vulgaris      | Brazil         | 6726123 | 7586  | 0.61 | 7586  | 402 |                                                              |
| 2515154134 | Rhizobium gallicum bv. gallicum R602sp      | this study                                                                                                                                                                                                                                                                                                                                                                                                                                                                                        | Alphaproteobacteria | Phaseolus vulgaris      | France         | 7220242 | 6977  | 0.61 | 6900  | 38  | Temperate broadleaf and mixed forests                        |
| 2513237159 | Rhizobium giardinii bv. giardinii H152      | this study                                                                                                                                                                                                                                                                                                                                                                                                                                                                                        | Alphaproteobacteria | Phaseolus vulgaris      | France         | 6810126 | 6691  | 0.61 | 6618  | 190 | Temperate broadleaf and mixed forests                        |
| 2534681796 | Rhizobium grahamii CCGE 502                 | Althabegoiti MJ, Lozano L, Torres-Tejerizo G, Ormeño-Orrillo E, Rogel MA, González V, Martínez-Romero E. Genome sequence of Rhizobium grahamii CCGE502, a broad-host-range symbiont with low nodulation competitiveness in Phaseolus vulgaris. (2012). J Bacteriol. 194(23):6651-2.                                                                                                                                                                                                               | Alphaproteobacteria | Dalea leporina          | Mexico         | 7146037 | 6898  | 0.59 | 6844  | 80  |                                                              |
| 2513237093 | Rhizobium leguminosarum bv phaseoli FA23    | this study                                                                                                                                                                                                                                                                                                                                                                                                                                                                                        | Alphaproteobacteria | Phaseolus vulgaris      | Poland         | 7545552 | 7285  | 0.61 | 7203  | 66  | Temperate broadleaf and mixed forests                        |
| 2509276052 | Rhizobium leguminosarum bv trifolii CC278f  | this study                                                                                                                                                                                                                                                                                                                                                                                                                                                                                        | Alphaproteobacteria | Trifolium nanum         | USA            | 8729608 | 8665  | 0.61 | 8582  | 7   | Temperate grasslands, savannas and grasslands                |
| 2517287029 | Rhizobium leguminosarum bv trifolii SRDI565 | this study                                                                                                                                                                                                                                                                                                                                                                                                                                                                                        | Alphaproteobacteria | Trifolium subterraneum  | Australia      | 6905599 | 6836  | 0.61 | 6750  | 7   | Temperate grasslands, savannas and grasslands                |
| 2510461076 | Rhizobium leguminosarum bv trifolii TA1     | this study                                                                                                                                                                                                                                                                                                                                                                                                                                                                                        | Alphaproteobacteria | Trifolium subterraneum  | Australia      | 8618824 | 8576  | 0.61 | 8493  | 6   | Temperate broadleaf and mixed forests                        |
| 2510065019 | Rhizobium leguminosarum bv trifolii WSM16   | this study                                                                                                                                                                                                                                                                                                                                                                                                                                                                                        | Alphaproteobacteria | Trifolium uniflorum     | Greece         | 6903379 | 6798  | 0.61 | 6709  | 6   | Mediterranean forests, woodlands and scrub                   |
| 2508501100 | Rhizobium leguminosarum bv trifolii WSM22   | this study                                                                                                                                                                                                                                                                                                                                                                                                                                                                                        | Alphaproteobacteria | Trifolium africanum     | South Africa   | 7999455 | 7827  | 0.61 | 7746  | 4   | Montane grasslands and shrublands                            |
| 2515154115 | Rhizobium leguminosarum bv viciae 128C53    | this study                                                                                                                                                                                                                                                                                                                                                                                                                                                                                        | Alphaproteobacteria | Pisum sativum           | United Kingdom | 7609235 | 7396  | 0.61 | 7322  | 72  | Temperate broadleaf and mixed forests                        |
| 2513237162 | Rhizobium leguminosarum bv viciae GB30      | this study                                                                                                                                                                                                                                                                                                                                                                                                                                                                                        | Alphaproteobacteria | Pisum sativum           | Poland         | 7468464 | 7302  | 0.61 | 7227  | 78  | Temperate broadleaf and mixed forests                        |
| 2513237084 | Rhizobium leguminosarum bv viciae UPM113    | this study                                                                                                                                                                                                                                                                                                                                                                                                                                                                                        | Alphaproteobacteria | Pisum sativum           | Italy          | 7231967 | 6951  | 0.61 | 6870  | 41  | Temperate and subtropical coniferous forest                  |
| 2513237085 | Rhizobium leguminosarum bv viciae UPM113    | this study                                                                                                                                                                                                                                                                                                                                                                                                                                                                                        | Alphaproteobacteria | Pisum sativum           | Italy          | 7695351 | 7462  | 0.61 | 7390  | 49  | Temperate broadleaf and mixed forests                        |
| 2513237103 | Rhizobium leguminosarum bv viciae VF39      | this study                                                                                                                                                                                                                                                                                                                                                                                                                                                                                        | Alphaproteobacteria | Vicia faba              | Germany        | 7647401 | 7469  | 0.61 | 7392  | 89  | Temperate broadleaf and mixed forests                        |
| 2509276044 | Rhizobium leguminosarum bv viciae WSM145    | this study                                                                                                                                                                                                                                                                                                                                                                                                                                                                                        | Alphaproteobacteria | Vicia faba              | Greece         | 7557514 | 7494  | 0.61 | 7418  | 3   | Mediterranean forests, woodlands and scrub                   |
| 2516653077 | Rhizobium leguminosarum bv viciae WSM148    | this study                                                                                                                                                                                                                                                                                                                                                                                                                                                                                        | Alphaproteobacteria | Vicia faba              | Greece         | 7555578 | 7464  | 0.61 | 7374  | 6   | Mediterranean forests, woodlands and scrub                   |
| 2516653085 | Rhizobium leguminosarum bv. phaseoli 4292   | this study                                                                                                                                                                                                                                                                                                                                                                                                                                                                                        | Alphaproteobacteria | Phaseolus vulgaris      | United Kingdom | 7346596 | 7193  | 0.61 | 7109  | 5   | Temperate broadleaf and mixed forests                        |
| 2510065076 | Rhizobium leguminosarum bv. trifolii CB782  | this study                                                                                                                                                                                                                                                                                                                                                                                                                                                                                        | Alphaproteobacteria | Trifolium semipilosum   | Kenya          | 6703653 | 6559  | 0.61 | 6472  | 4   | Montane grasslands and shrublands                            |
| 2507525018 | Rhizobium leguminosarum bv. trifolii CC283b | this study                                                                                                                                                                                                                                                                                                                                                                                                                                                                                        | Alphaproteobacteria | Trifolium ambiguum      | Caucasus       | 7923462 | 7731  | 0.61 | 7654  | 11  | Temperate grasslands, savannas and grasslands                |
| 2517093000 | Rhizobium leguminosarum bv. trifolii SRDI94 | this study                                                                                                                                                                                                                                                                                                                                                                                                                                                                                        | Alphaproteobacteria | Trifolium subterraneum  | Australia      | 7412387 | 7406  | 0.61 | 7317  | 5   | Temperate grasslands, savannas and grasslands                |
| 644736401  | Rhizobium leguminosarum bv. trifolii WSM13  | this study                                                                                                                                                                                                                                                                                                                                                                                                                                                                                        | Alphaproteobacteria | Trifolium sp.           | Greece         | 7418122 | 7292  | 0.61 | 7232  | 6   | Mediterranean forests, woodlands and scrub                   |
| 2509276033 | Rhizobium leguminosarum bv. trifolii WSM2C  | this study                                                                                                                                                                                                                                                                                                                                                                                                                                                                                        | Alphaproteobacteria | Trifolium rueppellianum | Ethiopia       | 7180565 | 7166  | 0.61 | 7080  | 6   | Montane grasslands and shrublands                            |
| 643348569  | Rhizobium leguminosarum bv. trifolii WSM23  | this study                                                                                                                                                                                                                                                                                                                                                                                                                                                                                        | Alphaproteobacteria | Trifolium polymorphum   | Uruguay        | 6872702 | 6643  | 0.61 | 6581  | 5   | Temperate grasslands, savannas and grasslands                |
| 2509276021 | Rhizobium leguminosarum bv. trifolii WSM59  | this study                                                                                                                                                                                                                                                                                                                                                                                                                                                                                        | Alphaproteobacteria | Trifolium pallidum      | Uruguay        | 7634384 | 7481  | 0.61 | 7394  | 2   | Temperate grasslands, savannas and grasslands                |
| 2515075009 | Rhizobium leguminosarum bv. viciae 248      | this study                                                                                                                                                                                                                                                                                                                                                                                                                                                                                        | Alphaproteobacteria | Vicia faba              | United Kingdom | 7288508 | 7179  | 0.61 | 7090  | 7   | Temperate broadleaf and mixed forests                        |
| 639633055  | Rhizobium leguminosarum bv. viciae 3841     | Young JP, Crossman LC, Johnston AW, Thomson NR, Ghazoui ZF, Hull KH, Wexler M, Curson AR, Todd JD, Poole PS, Mauchline TH, East AK, Quail MA, Churcher C, Arrowsmith C, Cherevach I, Chillingworth T, Clarke K, Cronin A, Davis P, Fraser A, Hance Z, Hauser H, Jagels K, Moule S, Mungall K, Norbertczak H, Rabinowitsch E, Sanders M, Simmonds M, Whitehead S, Parkhill J. The genome of Rhizobium leguminosarum has recognizable core and accessory components. (2006). Genome Biol. 7(4):R34. | Alphaproteobacteria | Pisum sativum           | United Kingdom | 7751309 | 7357  | 0.61 | 7276  | 7   | Temperate broadleaf and mixed forests                        |
| 2515154116 | Rhizobium leguminosarum bv. viciae Ps8      | this study                                                                                                                                                                                                                                                                                                                                                                                                                                                                                        | Alphaproteobacteria | Pisum sativum           | United Kingdom | 7552979 | 7359  | 0.61 | 7282  | 69  | Temperate broadleaf and mixed forests                        |
| 2516653047 | Rhizobium leguminosarum bv. viciae TOM      | this study                                                                                                                                                                                                                                                                                                                                                                                                                                                                                        | Alphaproteobacteria | Pisum sativum           | Turkey         | 7357668 | 7255  | 0.61 | 7163  | 6   | Temperate broadleaf and mixed forests                        |
| 2515154113 | Rhizobium leguminosarum bv. viciae Vc2      | this study                                                                                                                                                                                                                                                                                                                                                                                                                                                                                        | Alphaproteobacteria | Vicia cracca            | United Kingdom | 7807172 | 7602  | 0.61 | 7478  | 142 | Temperate broadleaf and mixed forests                        |
| 2515154114 | Rhizobium leguminosarum bv. viciae Vh3      | this study                                                                                                                                                                                                                                                                                                                                                                                                                                                                                        | Alphaproteobacteria | Vicia hirsuta           | United Kingdom | 7848616 | 7647  | 0.61 | 7576  | 87  | Temperate broadleaf and mixed forests                        |
| 2529292951 | Rhizobium leguminosarum CCGE 510            | Servín-Garcidueñas LE, Rogel MA, Ormeño-Orrillo E, Delgado-Salinas A, Martínez-Romero J, Sánchez F, Martínez-Romero E. Genome sequence of Rhizobium sp. strain CCGE510, a symbiont isolated from nodules of the endangered wild bean Phaseolus albescens. (2012). J Bacteriol. 194(22):6310-1.                                                                                                                                                                                                    | Alphaproteobacteria | Phaseolus albescens     | Mexico         | 6916614 | 6642  | 0.61 | 6595  | 142 | Tropical and subtropical coniferous forests                  |
| 2524023209 | Rhizobium leucaenae USDA 9039               | this study                                                                                                                                                                                                                                                                                                                                                                                                                                                                                        | Alphaproteobacteria | Phaseolus vulgaris      | Brazil         | 6679728 | 6564  | 0.59 | 6476  | 98  | Tropical and subtropical grasslands, savannas and shrublands |

|            |                                   |                                                                                                                                                                                                                                                                       |                     |                      |               |         |      |      |      |      |                                                              |
|------------|-----------------------------------|-----------------------------------------------------------------------------------------------------------------------------------------------------------------------------------------------------------------------------------------------------------------------|---------------------|----------------------|---------------|---------|------|------|------|------|--------------------------------------------------------------|
| 2534682333 | Rhizobium mesoamericanum STM 3625 | Moulin, L., Mornico, D., Melkonian, R. & Klonowska, A. (2013). Draft genome sequence of Rhizobium mesoamericanum STM3625, a nitrogen-fixing symbiont of Mimosa pudica isolated in French Guiana (South America). Genome Announcements 1                               | Alphaproteobacteria | Mimosa pudica        | French Guiana | 6453427 | 6561 | 0.59 | 6494 | 92   | Tropical and subtropical moist broadleaf forest              |
| 2513237088 | Rhizobium mesoamericanum STM 6155 | this study                                                                                                                                                                                                                                                            | Alphaproteobacteria | Mimosa pudica        | New Caledonia | 6927906 | 6926 | 0.59 | 6855 | 147  | Tropical and subtropical dry broadleaf forest                |
| 2513237146 | Rhizobium mongolense USDA 1844    | this study                                                                                                                                                                                                                                                            | Alphaproteobacteria | Medicago ruthenica   | China         | 7166346 | 7223 | 0.59 | 7144 | 96   | Temperate grasslands, savannas and grasslands                |
| 2548876814 | Rhizobium phaseoli Ch24-10        | López-Guerrero, M. G., Ormeño-Orrillo, E., Velázquez, E., Rogel, M. A., Acosta, J. L., González, V., Martínez, J. & Martínez-Romero, E. (2012). Rhizobium etli taxonomy revised with novel genomic data and analyses. Systematic and Applied Microbiology 35, 353-358 | Alphaproteobacteria | Phaseolus vulgaris   | Mexico        | 6622294 | 6593 | 0.61 | 6515 | 352  | Tropical and subtropical grasslands, savannas and shrublands |
| 2513237138 | Rhizobium sp. OR 191              | this study                                                                                                                                                                                                                                                            | Alphaproteobacteria | Medicago sativa      | USA           | 7368160 | 7704 | 0.6  | 7617 | 240  | Temperate coniferous forests                                 |
| 2519899620 | Rhizobium sp. Pop5                | unpublished                                                                                                                                                                                                                                                           | Alphaproteobacteria | Phaseolus vulgaris   | Mexico        | 6499161 | 7071 | 0.61 | 7021 | 1413 |                                                              |
| 2513237144 | Rhizobium sullae WSM1592          | this study                                                                                                                                                                                                                                                            | Alphaproteobacteria | Hedysarum coronarium | Sardinia      | 7530820 | 7526 | 0.6  | 7453 | 118  | Mediterranean forests, woodlands and scrub                   |
| 2524023199 | Rhizobium tropici CIAT 899        | Ormeño-Orrillo et al. (2012) Genomic basis of broad host range and environmental adaptability of Rhizobium tropici CIAT 899 and Rhizobium sp. PRF 81 which are used in inoculants for common bean (Phaseolus vulgaris L.) BMC Genomics 13:735                         | Alphaproteobacteria | Phaseolus vulgaris   | Colombia      | 6686334 | 6494 | 0.59 | 6432 | 4    | Tropical and subtropical dry broadleaf forest                |
| 2545824643 | Rhizobium tropici PRF 81          | Ormeño-Orrillo et al. (2012) Genomic basis of broad host range and environmental adaptability of Rhizobium tropici CIAT 899 and Rhizobium sp. PRF 81 which are used in inoculants for common bean (Phaseolus vulgaris L.) BMC Genomics 13:735                         | Alphaproteobacteria | Phaseolus vulgaris   | Brazil        | 7083871 | 6331 | 0.6  | 6271 | 96   | Tropical and subtropical grasslands, savannas and shrublands |

Supplementary Table 2. General genome metrics for 163 RNB strains analyzed in this study.

| IMG taxon_id | Status          | Genome Name / Sample Name                    | Class               | Order           | Family              | Genome Size | Gene Count | Scaffold Count | GC   | CDS Count | RNA Count | rRNA Count | tRNA Count | w/ Func Pred Count | w/ Func Pred % | w/o function prediction | w/o function prediction % | COG Count | COG % | Pfam Count | Pfam % | TIGRfam Count | TIGRfam % | KO Count | KO %  | Signal Peptide Count | Signal Peptide % | Biosynthetic Cluster Gene Count | Biosynthetic Cluster Gene % | Biosynthetic Cluster Count |    |
|--------------|-----------------|----------------------------------------------|---------------------|-----------------|---------------------|-------------|------------|----------------|------|-----------|-----------|------------|------------|--------------------|----------------|-------------------------|---------------------------|-----------|-------|------------|--------|---------------|-----------|----------|-------|----------------------|------------------|---------------------------------|-----------------------------|----------------------------|----|
| 253468233    | Permanent Draft | Rhizobium mesoamericanum STM3625             | Alphaproteobacteria | Rhizobiales     | Rhizobiaceae        | 6,453,427   | 6,561      | 92             | 0.59 | 6494      | 67        | 3          | 45         | 5191               | 79.12          | 1303                    | 19.86                     | 4307      | 65.65 | 5085       | 77.5   | 1526          | 23.26     | 2908     | 44.32 | 494                  | 7.53             | 385                             | 5.87                        | 43                         |    |
| 2513237164   | Permanent Draft | Mesorhizobium loti CJ35m                     | Alphaproteobacteria | Rhizobiales     | Phyllobacteriaceae  | 7,563,725   | 7,401      | 70             | 0.62 | 7331      | 70        | 4          | 55         | 5682               | 76.77          | 1649                    | 22.28                     | 5074      | 68.56 | 5960       | 80.53  | 1644          | 22.21     | 3262     | 44.08 | 649                  | 8.77             | 478                             | 6.46                        | 50                         |    |
| 637000038    | Finished        | Bradyrhizobium japonicum USDA 110            | Alphaproteobacteria | Rhizobiales     | Bradyrhizobiaceae   | 9,105,828   | 8,402      | 1              | 0.64 | 8317      | 85        | 3          | 51         | 4530               | 53.92          | 3787                    | 45.07                     | 5329      | 63.43 | 6727       | 80.06  | 1856          | 22.09     | 3727     | 44.36 | 695                  | 8.27             | 676                             | 8.05                        | 67                         |    |
| 2515154189   | Permanent Draft | Burkholderia nodosa DSM 21604                | Betaproteobacteria  | Burkholderiales | Burkholderiaceae    | 9,629,924   | 8,863      | 114            | 0.64 | 8777      | 86        | 8          | 52         | 7227               | 81.54          | 1550                    | 17.49                     | 6171      | 69.63 | 7400       | 83.49  | 2191          | 24.72     | 4044     | 45.63 | 861                  | 9.71             | 712                             | 8.03                        | 66                         |    |
| 2513237098   | Permanent Draft | Bradyrhizobium elkanii WSM2783               | Alphaproteobacteria | Rhizobiales     | Bradyrhizobiaceae   | 9,902,361   | 9,734      | 217            | 0.62 | 9641      | 93        | 12         | 57         | 6876               | 70.64          | 2765                    | 28.41                     | 5739      | 58.96 | 7226       | 74.23  | 1931          | 19.84     | 3776     | 38.79 | 976                  | 10.03            | 766                             | 7.87                        | 82                         |    |
| 644736401    | Finished        | Rhizobium leguminosarum bv. trifolii WSM1325 | Alphaproteobacteria | Rhizobiales     | Rhizobiaceae        | 7,418,122   | 7,292      | 6              | 0.61 | 7232      | 60        | 9          | 51         | 5184               | 71.09          | 2048                    | 28.09                     | 5011      | 68.72 | 5984       | 82.06  | 1627          | 22.31     | 3377     | 46.31 | 652                  | 8.94             | 397                             | 5.44                        | 36                         |    |
| 2517572023   | Finished        | Ensifer fredii HH103                         | Alphaproteobacteria | Rhizobiales     | Rhizobiaceae        | 7,221,188   | 6,851      | 10             | 0.62 | 6789      | 62        | 9          | 57         | 5627               | 82.13          | 1162                    | 16.96                     | 4704      | 68.66 | 5566       | 81.24  | 1585          | 23.14     | 3053     | 44.56 | 524                  | 7.65             | 358                             | 5.23                        | 38                         |    |
| 2516653047   | Permanent Draft | Rhizobium leguminosarum bv. viciae TOM       | Alphaproteobacteria | Rhizobiales     | Rhizobiaceae        | 7,357,668   | 7,255      | 6              | 0.61 | 7163      | 92        | 9          | 53         | 5757               | 79.35          | 1406                    | 19.38                     | 5178      | 71.37 | 5985       | 82.49  | 1619          | 22.32     | 3410     | 47    | 631                  | 8.7              | 417                             | 5.75                        | 39                         |    |
| 2513237162   | Permanent Draft | Rhizobium leguminosarum bv. viciae GB30      | Alphaproteobacteria | Rhizobiales     | Rhizobiaceae        | 7,468,464   | 7,302      | 78             | 0.61 | 7227      | 75        | 6          | 49         | 5816               | 79.65          | 1411                    | 19.32                     | 5182      | 70.97 | 6025       | 82.51  | 1616          | 22.13     | 3443     | 47.15 | 634                  | 8.68             | 470                             | 6.44                        | 44                         |    |
| 2529292711   | Permanent Draft | Rhizobium etli CNPAF512                      | Alphaproteobacteria | Rhizobiales     | Rhizobiaceae        | 6,726,123   | 7,586      | 402            | 0.61 | 7586      | 0         | 0          | 0          | 4438               | 58.5           | 3148                    | 41.5                      | 3809      | 50.21 | 4415       | 58.2   | 1300          | 17.14     | 2556     | 33.69 | 406                  | 5.35             | 236                             | 3.11                        | 29                         |    |
| 2524023228   | Permanent Draft | Bradyrhizobium sp. Th.b2                     | Alphaproteobacteria | Rhizobiales     | Bradyrhizobiaceae   | 10,118,060  | 9,917      | 266            | 0.63 | 9809      | 108       | 3          | 64         | 7023               | 70.82          | 2786                    | 28.09                     | 5576      | 56.23 | 7185       | 72.45  | 1875          | 18.91     | 3649     | 36.8  | 978                  | 9.86             | 713                             | 7.19                        | 71                         |    |
| 2517093000   | Permanent Draft | Rhizobium leguminosarum bv. trifolii SRD1943 | Alphaproteobacteria | Rhizobiales     | Rhizobiaceae        | 7,412,387   | 7,406      | 5              | 0.61 | 7317      | 89        | 9          | 58         | 5823               | 78.63          | 1494                    | 20.17                     | 5171      | 69.82 | 6032       | 81.45  | 1651          | 22.29     | 3391     | 45.79 | 631                  | 8.52             | 398                             | 5.37                        | 37                         |    |
| 2512875026   | Permanent Draft | Ensifer medicae WSM1115                      | Alphaproteobacteria | Rhizobiales     | Rhizobiaceae        | 6,861,065   | 6,872      | 7              | 0.61 | 6789      | 83        | 9          | 56         | 5241               | 76.27          | 1548                    | 22.53                     | 4609      | 67.51 | 5422       | 78.9   | 1567          | 22.8      | 3092     | 44.99 | 571                  | 8.31             | 318                             | 4.63                        | 32                         |    |
| 2511231207   | Finished        | Bradyrhizobium japonicum USDA 6              | Alphaproteobacteria | Rhizobiales     | Bradyrhizobiaceae   | 9,207,384   | 8,886      | 1              | 0.64 | 8829      | 57        | 6          | 51         | 6692               | 75.31          | 2137                    | 24.05                     | 5509      | 62    | 6819       | 76.74  | 1816          | 20.44     | 3715     | 41.81 | 901                  | 10.14            | 634                             | 7.13                        | 61                         |    |
| 2513237138   | Permanent Draft | Rhizobium sp. OR 191                         | Alphaproteobacteria | Rhizobiales     | Rhizobiaceae        | 7,368,160   | 7,704      | 240            | 0.6  | 7617      | 87        | 6          | 49         | 5558               | 72.14          | 2059                    | 26.73                     | 4702      | 61.03 | 5866       | 76.14  | 1621          | 21.04     | 3169     | 41.13 | 576                  | 7.48             | 387                             | 5.02                        | 39                         |    |
| 642555152    | Finished        | Rhizobium etli CIAT 652                      | Alphaproteobacteria | Rhizobiales     | Rhizobiaceae        | 6,448,048   | 6,132      | 4              | 0.61 | 6072      | 60        | 9          | 51         | 4091               | 66.72          | 1981                    | 32.31                     | 4337      | 70.73 | 4994       | 81.44  | 1532          | 24.98     | 2959     | 48.26 | 487                  | 7.94             | 350                             | 5.71                        | 31                         |    |
| 2545555834   | Permanent Draft | Methylobacterium sp. WSM2598                 | Alphaproteobacteria | Rhizobiales     | Methylobacteriaceae | 8,130,841   | 7,667      | 85             | 0.71 | 7551      | 116       | 18         | 67         | 5559               | 72.51          | 1992                    | 25.98                     | 4463      | 58.21 | 5638       | 73.54  | 1717          | 22.39     | 2957     | 38.57 | 573                  | 9.82             | 339                             | 4.42                        | 43                         |    |
| 2551306089   | Permanent Draft | Ensifer meliloti 1A42                        | Alphaproteobacteria | Rhizobiales     | Rhizobiaceae        | 7,162,724   | 7,454      | 315            | 0.62 | 7360      | 94        | 6          | 60         | 5837               | 72.31          | 1523                    | 20.43                     | 4672      | 62.68 | 5920       | 79.42  | 1633          | 21.91     | 3012     | 40.41 | 567                  | 7.61             | 405                             | 5.43                        | 43                         |    |
| 2513237268   | Permanent Draft | Bradyrhizobium sp. ORS285                    | Alphaproteobacteria | Rhizobiales     | Bradyrhizobiaceae   | 7,602,254   | 6,842      | 301            | 0.65 | 6778      | 64        | 4          | 49         | 5417               | 79.17          | 1361                    | 19.89                     | 4563      | 66.69 | 5476       | 80.04  | 1681          | 24.57     | 3257     | 47.6  | 715                  | 10.45            | 489                             | 7.15                        | 49                         |    |
| 2512875016   | Permanent Draft | Mesorhizobium loti R7A                       | Alphaproteobacteria | Rhizobiales     | Phyllobacteriaceae  | 6,529,530   | 6,398      | 1              | 0.63 | 6323      | 75        | 8          | 58         | 5127               | 80.13          | 1196                    | 18.69                     | 4695      | 73.38 | 5332       | 83.34  | 1504          | 23.51     | 2978     | 46.55 | 565                  | 8.83             | 510                             | 7.97                        | 44                         |    |
| 2513237145   | Permanent Draft | Bradyrhizobium elkanii USDA 3254             | Alphaproteobacteria | Rhizobiales     | Bradyrhizobiaceae   | 8,979,722   | 8,564      | 85             | 0.64 | 8487      | 77        | 3          | 53         | 6286               | 73.4           | 2201                    | 25.7                      | 5374      | 62.75 | 6635       | 77.48  | 1788          | 20.88     | 3529     | 41.21 | 900                  | 10.51            | 702                             | 8.2                         | 65                         |    |
| 643692032    | Finished        | Ensifer fredii NGR234                        | Alphaproteobacteria | Rhizobiales     | Rhizobiaceae        | 6,891,900   | 6,437      | 3              | 0.62 | 6376      | 61        | 9          | 52         | 4788               | 74.38          | 1588                    | 24.67                     | 4578      | 71.12 | 5424       | 84.26  | 1580          | 24.55     | 3148     | 48.9  | 497                  | 7.72             | 377                             | 5.86                        | 36                         |    |
| 2528768022   | Permanent Draft | Bradyrhizobium japonicum USDA 123            | Alphaproteobacteria | Rhizobiales     | Bradyrhizobiaceae   | 10,457,665  | 10,573     | 517            | 0.63 | 10476     | 97        | 3          | 57         | 7389               | 69.89          | 3087                    | 29.2                      | 5735      | 54.24 | 7580       | 71.69  | 1946          | 18.41     | 3749     | 35.46 | 1035                 | 9.79             | 596                             | 5.64                        | 77                         |    |
| 2515154122   | Permanent Draft | Burkholderia sp. JPY251                      | Betaproteobacteria  | Burkholderiales | Burkholderiaceae    | 8,609,520   | 7,983      | 122            | 0.63 | 7893      | 90        | 10         | 53         | 6330               | 79.29          | 1563                    | 19.58                     | 5352      | 67.04 | 6488       | 81.27  | 2032          | 25.45     | 3533     | 44.26 | 735                  | 9.21             | 525                             | 6.58                        | 58                         |    |
| 2513237087   | Permanent Draft | Azorhizobium doebereineriae UFLA1-100        | Betaproteobacteria  | Rhizobiales     | Xanthobacteraceae   | 5,817,514   | 5,415      | 104            | 0.69 | 5347      | 68        | 8          | 49         | 4376               | 80.81          | 971                     | 17.93                     | 3820      | 70.54 | 4590       | 84.76  | 1521          | 28.09     | 2661     | 49.14 | 440                  | 8.13             | 389                             | 7.18                        | 38                         |    |
| 2513237096   | Permanent Draft | Bradyrhizobium elkanii USDA 3259             | Alphaproteobacteria | Rhizobiales     | Bradyrhizobiaceae   | 8,722,461   | 8,327      | 101            | 0.64 | 8253      | 74        | 3          | 53         | 6153               | 73.89          | 2100                    | 25.22                     | 5259      | 63.16 | 6490       | 77.94  | 1764          | 21.18     | 3474     | 41.72 | 884                  | 10.62            | 687                             | 8.25                        | 67                         |    |
| 2509276022   | Finished        | Mesorhizobium australicum WSM2073            | Alphaproteobacteria | Rhizobiales     | Phyllobacteriaceae  | 6,200,534   | 6,080      | 1              | 0.63 | 6013      | 67        | 6          | 52         | 4876               | 80.2           | 1137                    | 18.7                      | 4451      | 73.21 | 5082       | 83.59  | 1510          | 24.84     | 2931     | 48.21 | 536                  | 8.82             | 457                             | 7.52                        | 46                         |    |
| 2508501009   | Permanent Draft | Bradyrhizobium sp. WSM471                    | Alphaproteobacteria | Rhizobiales     | Bradyrhizobiaceae   | 7,784,016   | 7,430      | 1              | 0.63 | 7372      | 58        | 3          | 47         | 5511               | 74.17          | 1861                    | 25.05                     | 4763      | 64.1  | 5762       | 77.55  | 1659          | 22.33     | 3221     | 43.35 | 834                  | 11.22            | 509                             | 6.85                        | 51                         |    |
| 649633066    | Finished        | Mesorhizobium ciceri bv. biserrulae WSM1271  | Alphaproteobacteria | Rhizobiales     | Phyllobacteriaceae  | 6,690,028   | 6,531      | 2              | 0.63 | 6470      | 61        | 6          | 52         | 4642               | 71.08          | 1828                    | 27.99                     | 4719      | 72.26 | 5398       | 82.65  | 1592          | 24.38     | 3132     | 47.96 | 597                  | 9.14             | 428                             | 6.55                        | 44                         |    |
| 2510065059   | Permanent Draft | Mesorhizobium ciceri WSM4083                 | Alphaproteobacteria | Rhizobiales     | Phyllobacteriaceae  | 6,847,884   | 6,662      | 42             | 0.63 | 6596      | 66        | 4          | 50         | 5262               | 78.99          | 1334                    | 20.02                     | 4734      | 71.06 | 5460       | 81.96  | 1610          | 24.17     | 3129     | 46.97 | 584                  | 8.77             | 471                             | 7.07                        | 49                         |    |
| 2524023207   | Permanent Draft | Ensifer sp. USDA 6670, CC2017                | Alphaproteobacteria | Rhizobiales     | Rhizobiaceae        | 6,813,453   | 6,547      | 73             | 0.62 | 6465      | 82        | 4          | 57         | 5407               | 82.59          | 1058                    | 16.16                     | 4780      | 64.65 | 7301       | 54.85  | 83.78         | 1568      | 23.95    | 3198  | 48.85                | 589              | 9                               | 394                         | 6.02                       | 38 |
| 2519899620   | Permanent Draft | Rhizobium sp. Pop5                           | Alphaproteobacteria | Rhizobiales     | Rhizobiaceae        | 6,499,161   | 7,071      | 1,413          | 0.61 | 7021      | 50        | 3          | 47         | 5945               | 84.08          | 1076                    | 15.22                     | 4068      | 57.53 | 5618       | 79.45  | 1484          | 20.99     | 2701     | 38.2  | 492                  | 6.96             | 220                             | 3.11                        | 31                         |    |
| 2517287029   | Permanent Draft | Rhizobium leguminosarum bv. trifolii SRD1565 | Alphaproteobacteria | Rhizobiales     | Rhizobiaceae        | 6,905,599   | 6,836      | 7              | 0.61 | 6750      | 86        | 9          | 56         | 5338               | 78.09          | 1412                    | 20.66                     | 4736      | 68.28 | 5935       | 80.97  | 1555          | 22.75     | 3172     | 46.4  | 603                  | 8.82             | 382                             | 5.59                        | 34                         |    |
| 2513237083   | Permanent Draft | Burkholderia mimosarum LMG 23256             | Betaproteobacteria  | Burkholderiales | Burkholderiaceae    | 8,410,967   | 7,886      | 268            | 0.64 | 7801      | 85        | 8          | 56         | 6112               | 77.5           | 1689                    | 21.42                     | 4974      | 63.07 | 6248       | 79.23  | 1957          | 24.82     | 3378     | 42.84 | 673                  | 8.53             | 492                             | 6.24                        | 58                         |    |
| 64348569     | Finished        | Rhizobium leguminosarum bv. trifolii WSM2304 | Alphaproteobacteria | Rhizobiales     | Rhizobiaceae        | 6,872,702   | 6,643      | 5              | 0.61 | 6581      | 62        | 9          | 53         | 4833               | 72.75          | 1748                    | 26.31                     | 4712      | 70.93 | 5444       | 83.46  | 1576          | 23.72     | 3231     | 48.64 | 599                  | 9.02             | 405                             | 6.1                         | 38                         |    |
| 2515075009   | Permanent Draft | Rhizobium leguminosarum bv. viciae 248       | Alphaproteobacteria | Rhizobiales     | Rhizobiaceae        | 7,288,508   | 7,179      | 7              | 0.61 | 7090      | 89        | 9          | 51         | 5679               | 79.11          | 1411                    | 19.65                     | 5078      | 70.73 | 5880       | 81.91  | 1627          | 22.66     | 3363     | 46.84 | 644                  | 8.97             | 425                             | 5.92                        | 42                         |    |
| 2523533632   | Finished</      |                                              |                     |                 |                     |             |            |                |      |           |           |            |            |                    |                |                         |                           |           |       |            |        |               |           |          |       |                      |                  |                                 |                             |                            |    |

|            |                 |                                            |                     |                 |                    |            |         |     |      |      |     |    |    |      |       |      |       |      |       |      |       |      |       |      |       |     |       |      |      |      |    |
|------------|-----------------|--------------------------------------------|---------------------|-----------------|--------------------|------------|---------|-----|------|------|-----|----|----|------|-------|------|-------|------|-------|------|-------|------|-------|------|-------|-----|-------|------|------|------|----|
| 2513237088 | Permanent Draft | Rhizobium mesoamericanum STM6155           | Alphaproteobacteria | Rhizobiales     | Rhizobiaceae       | 6,927,906  | 6,926   | 147 | 0.59 | 6855 | 71  | 3  | 47 | 5281 | 76.25 | 1574 | 22.73 | 4585 | 66.2  | 5526 | 79.79 | 1606 | 23.19 | 3081 | 44.48 | 538 | 7.77  | 433  | 6.25 | 49   |    |
| 640753051  | Finished        | Ensifer medicae WSM419                     | Alphaproteobacteria | Rhizobiales     | Rhizobiaceae       | 6,817,576  | 6,599   | 4   | 0.61 | 6518 | 81  | 9  | 53 | 4671 | 70.78 | 1847 | 27.99 | 4647 | 70.42 | 5454 | 82.65 | 1577 | 23.9  | 3127 | 47.39 | 541 | 8.2   | 339  | 5.14 | 34   |    |
| 2551306087 | Permanent Draft | Ensifer melliloti A0643DD                  | Alphaproteobacteria | Rhizobiales     | Rhizobiaceae       | 7,351,905  | 7,849   | 678 | 0.62 | 7755 | 94  | 6  | 56 | 5991 | 76.33 | 1764 | 22.47 | 4609 | 58.72 | 6084 | 77.51 | 1648 | 21    | 2964 | 37.76 | 580 | 7.39  | 369  | 4.7  | 46   |    |
| 2545824643 | Permanent Draft | Rhizobium tropici PRF 81                   | Alphaproteobacteria | Rhizobiales     | Rhizobiaceae       | 7,083,871  | 6,331   | 96  | 0.6  | 6271 | 60  | 9  | 51 | 5199 | 82.12 | 1072 | 16.93 | 4466 | 70.54 | 5183 | 81.87 | 1492 | 23.57 | 2988 | 47.2  | 435 | 6.87  | 342  | 5.4  | 34   |    |
| 2513237163 | Permanent Draft | Cupriavidus sp. gt. E UYPR2.512            | Betaproteobacteria  | Burkholderiales | Burkholderiaceae   | 7,858,949  | 7,487   | 365 | 0.65 | 7411 | 76  | 6  | 56 | 5663 | 75.64 | 1748 | 23.35 | 4807 | 64.2  | 5959 | 79.59 | 1804 | 24.1  | 3323 | 44.38 | 696 | 9.3   | 419  | 5.6  | 45   |    |
| 2513237312 | Permanent Draft | Bradyrhizobium sp. STM 3809                | Alphaproteobacteria | Rhizobiales     | Bradyrhizobiaceae  | 7,311,748  | 6,699   | 803 | 0.66 | 6637 | 62  | 3  | 46 | 5192 | 77.5  | 1445 | 21.57 | 4237 | 63.25 | 5217 | 77.88 | 1558 | 23.26 | 3060 | 45.68 | 693 | 10.34 | 285  | 4.25 | 41   |    |
| 2516653074 | Permanent Draft | Burkholderia sp. WSM4176                   | Betaproteobacteria  | Burkholderiales | Burkholderiaceae   | 9,065,247  | 8,497   | 13  | 0.63 | 8369 | 128 | 21 | 66 | 6416 | 75.51 | 1953 | 22.98 | 5491 | 64.62 | 6766 | 79.63 | 2034 | 23.94 | 3649 | 42.94 | 738 | 8.69  | 648  | 7.63 | 56   |    |
| 2513237103 | Permanent Draft | Rhizobium leguminosarum bv. viciae VF39    | Alphaproteobacteria | Rhizobiales     | Rhizobiaceae       | 7,647,401  | 7,469   | 89  | 0.61 | 7392 | 77  | 2  | 48 | 5948 | 78.64 | 1444 | 19.33 | 5255 | 70.36 | 6157 | 82.43 | 1664 | 22.28 | 3492 | 46.75 | 643 | 8.61  | 490  | 6.56 | 59   |    |
| 2508501124 | Permanent Draft | Burkholderia dilworthii WSM3556            | Betaproteobacteria  | Burkholderiales | Burkholderiaceae   | 7,679,067  | 7,123   | 140 | 0.62 | 7059 | 64  | 4  | 47 | 5433 | 76.27 | 1626 | 22.83 | 4704 | 66.04 | 5730 | 80.44 | 1831 | 25.71 | 3186 | 44.73 | 642 | 9.01  | 426  | 5.98 | 39   |    |
| 2519103088 | Permanent Draft | Bradyrhizobium sp. ORS 375                 | Alphaproteobacteria | Rhizobiales     | Bradyrhizobiaceae  | 7,859,468  | 7,143   | 497 | 0.65 | 7078 | 65  | 3  | 51 | 5546 | 77.64 | 1532 | 21.45 | 4565 | 63.91 | 5586 | 78.2  | 1687 | 23.62 | 3253 | 45.54 | 732 | 10.25 | 469  | 6.57 | 53   |    |
| 2513237143 | Permanent Draft | Ensifer melliloti MLaz-1                   | Alphaproteobacteria | Rhizobiales     | Rhizobiaceae       | 6,664,116  | 6,388   | 99  | 0.62 | 6314 | 74  | 2  | 52 | 5192 | 81.28 | 1122 | 17.56 | 4659 | 72.93 | 5357 | 83.86 | 1579 | 24.72 | 3080 | 48.22 | 555 | 8.69  | 355  | 5.56 | 37   |    |
| 2515154113 | Permanent Draft | Rhizobium leguminosarum bv. viciae Vc2     | Alphaproteobacteria | Rhizobiales     | Rhizobiaceae       | 7,807,172  | 7,602   | 142 | 0.61 | 7478 | 124 | 3  | 53 | 6052 | 79.61 | 1426 | 18.76 | 5348 | 70.35 | 6279 | 82.6  | 1674 | 22.02 | 3556 | 46.78 | 654 | 8.6   | 471  | 6.2  | 47   |    |
| 2510065045 | Permanent Draft | Burkholderia sprentiae WSM5005             | Betaproteobacteria  | Burkholderiales | Burkholderiaceae   | 7,761,063  | 7,223   | 8   | 0.63 | 7147 | 76  | 7  | 58 | 5506 | 76.23 | 1641 | 22.72 | 4762 | 65.93 | 5810 | 80.44 | 1890 | 26.17 | 3253 | 45.04 | 687 | 9.51  | 491  | 6.8  | 46   |    |
| 2516653077 | Permanent Draft | Rhizobium leguminosarum bv. viciae WSM1481 | Alphaproteobacteria | Rhizobiales     | Rhizobiaceae       | 7,555,378  | 7,464   | 6   | 0.61 | 7374 | 90  | 9  | 55 | 5973 | 80.02 | 1401 | 18.77 | 5355 | 71.74 | 6183 | 82.84 | 1674 | 22.43 | 3513 | 47.07 | 647 | 8.67  | 478  | 6.4  | 43   |    |
| 2513237084 | Permanent Draft | Rhizobium leguminosarum bv. viciae UPM1131 | Alphaproteobacteria | Rhizobiales     | Rhizobiaceae       | 7,231,967  | 6,951   | 41  | 0.61 | 6870 | 81  | 5  | 46 | 5635 | 81.07 | 1235 | 17.77 | 5064 | 72.85 | 5846 | 84.1  | 1637 | 23.55 | 3376 | 48.57 | 633 | 9.11  | 461  | 6.63 | 45   |    |
| 2513237146 | Permanent Draft | Rhizobium mongolense USDA 1844             | Alphaproteobacteria | Rhizobiales     | Rhizobiaceae       | 7,166,346  | 7,223   | 96  | 0.59 | 7144 | 79  | 5  | 48 | 5433 | 75.22 | 1711 | 23.69 | 4686 | 64.88 | 5643 | 78.13 | 1571 | 21.75 | 3165 | 43.82 | 556 | 7.7   | 409  | 5.66 | 36   |    |
| 2517572076 | Permanent Draft | Mesorhizobium loti NZP2037                 | Alphaproteobacteria | Rhizobiales     | Phyllobacteriaceae | 7,462,792  | 7,388   | 1   | 0.63 | 7318 | 70  | 4  | 52 | 5985 | 81.01 | 1333 | 18.04 | 5271 | 71.35 | 6121 | 82.85 | 1662 | 22.5  | 3367 | 45.57 | 654 | 8.85  | 572  | 7.74 | 51   |    |
| 2534681796 | Permanent Draft | Rhizobium sp. CCGE 502                     | Alphaproteobacteria | Rhizobiales     | Rhizobiaceae       | 7,146,037  | 6,898   | 80  | 0.59 | 6844 | 54  | 4  | 50 | 5657 | 82.01 | 1187 | 17.21 | 4685 | 67.92 | 5586 | 80.98 | 1617 | 23.44 | 3097 | 44.9  | 533 | 7.73  | 298  | 4.32 | 36   |    |
| 2513237144 | Permanent Draft | Rhizobium sultae WSM1592                   | Alphaproteobacteria | Rhizobiales     | Rhizobiaceae       | 7,530,820  | 7,526   | 118 | 0.6  | 7453 | 73  | 4  | 47 | 5907 | 78.49 | 1546 | 20.54 | 5148 | 68.4  | 6174 | 82.04 | 1676 | 22.27 | 3417 | 45.4  | 659 | 8.76  | 538  | 7.15 | 47   |    |
| 2517093001 | Permanent Draft | Bradyrhizobium japonicum USDA 124          | Alphaproteobacteria | Rhizobiales     | Bradyrhizobiaceae  | 9,002,274  | 8,621   | 123 | 0.64 | 8509 | 112 | 3  | 52 | 6253 | 72.53 | 2256 | 26.17 | 5338 | 61.92 | 6595 | 76.5  | 1802 | 20.9  | 3562 | 41.32 | 966 | 11.21 | 540  | 6.26 | 60   |    |
| 2524023210 | Permanent Draft | Bradyrhizobium sp. Ai1a-2                  | Alphaproteobacteria | Rhizobiales     | Bradyrhizobiaceae  | 9,029,266  | 8,584   | 246 | 0.63 | 8482 | 102 | 3  | 80 | 6449 | 75.13 | 2033 | 23.68 | 5111 | 59.54 | 6590 | 76.77 | 1827 | 21.28 | 3445 | 40.13 | 937 | 9.75  | 837  | 9.75 | 90   |    |
| 2551306092 | Permanent Draft | Ensifer melliloti AK75                     | Alphaproteobacteria | Rhizobiales     | Rhizobiaceae       | 6,992,595  | 7,636   | 700 | 0.62 | 7550 | 86  | 6  | 59 | 5962 | 68.08 | 1588 | 20.8  | 4499 | 58.92 | 6046 | 79.18 | 1587 | 20.78 | 2880 | 37.72 | 544 | 7.12  | 311  | 4.07 | 35   |    |
| 650716086  | Finished        | Ensifer melliloti AK83, DSM 23913          | Alphaproteobacteria | Rhizobiales     | Rhizobiaceae       | 7,140,471  | 7,022   | 5   | 0.62 | 6954 | 68  | 9  | 56 | 4897 | 79.78 | 2057 | 29.29 | 4825 | 68.71 | 5633 | 80.22 | 1602 | 22.81 | 3139 | 40.7  | 563 | 8.02  | 381  | 5.43 | 39   |    |
| 2512047086 | Permanent Draft | Ensifer arboris LMG 14919                  | Alphaproteobacteria | Rhizobiales     | Rhizobiaceae       | 6,850,303  | 6,545   | 7   | 0.62 | 6461 | 84  | 9  | 54 | 5291 | 80.84 | 1170 | 17.88 | 4743 | 72.47 | 5447 | 83.22 | 1638 | 25.03 | 3190 | 48.74 | 588 | 8.98  | 364  | 5.56 | 42   |    |
| 2513237166 | Permanent Draft | Burkholderia sp. UYPR1.413                 | Betaproteobacteria  | Burkholderiales | Burkholderiaceae   | 10,373,764 | 9,836   | 336 | 0.62 | 9759 | 77  | 8  | 50 | 7469 | 75.94 | 2290 | 23.28 | 6103 | 62.05 | 7607 | 77.78 | 2306 | 23.44 | 4048 | 41.15 | 934 | 9.5   | 471  | 4.59 | 52   |    |
| 2508501128 | Permanent Draft | Bradyrhizobium sp. ARR65                   | Alphaproteobacteria | Rhizobiales     | Bradyrhizobiaceae  | 8,613,869  | 8,310   | 139 | 0.62 | 8246 | 64  | 3  | 49 | 5921 | 71.25 | 2325 | 27.98 | 4962 | 59.71 | 6239 | 75.08 | 1744 | 20.99 | 3386 | 40.75 | 798 | 9.6   | 606  | 6.79 | 63   |    |
| 2551306090 | Permanent Draft | Ensifer melliloti A0641M                   | Alphaproteobacteria | Rhizobiales     | Rhizobiaceae       | 7,953,713  | 8,520   | 451 | 0.62 | 8412 | 108 | 9  | 66 | 6415 | 75.29 | 1997 | 23.44 | 5038 | 59.13 | 6514 | 76.46 | 1798 | 21.1  | 3219 | 37.78 | 596 | 7     | 409  | 4.8  | 42   |    |
| 2513237156 | Permanent Draft | Ensifer medicae WSM1369                    | Alphaproteobacteria | Rhizobiales     | Rhizobiaceae       | 6,402,557  | 6,735   | 307 | 0.61 | 6656 | 79  | 3  | 48 | 4994 | 74.15 | 1662 | 24.68 | 4179 | 62.05 | 5188 | 77.03 | 1542 | 22.9  | 2842 | 42.2  | 508 | 7.54  | 289  | 4.29 | 33   |    |
| 2509276044 | Permanent Draft | Rhizobium leguminosarum bv. viciae WSM1455 | Alphaproteobacteria | Rhizobiales     | Rhizobiaceae       | 7,557,514  | 7,494   | 3   | 0.61 | 7418 | 76  | 6  | 48 | 5464 | 72.91 | 1954 | 26.07 | 5359 | 71.51 | 6176 | 82.41 | 1674 | 22.34 | 3505 | 46.77 | 649 | 8.66  | 461  | 6.15 | 42   |    |
| 2513237147 | Permanent Draft | Mesorhizobium loti USDA 3471               | Alphaproteobacteria | Rhizobiales     | Phyllobacteriaceae | 7,023,073  | 6,785   | 50  | 0.63 | 6714 | 71  | 6  | 52 | 5443 | 80.22 | 1271 | 18.73 | 4913 | 72.41 | 5669 | 83.55 | 1609 | 23.71 | 3207 | 47.27 | 607 | 8.95  | 412  | 6.07 | 44   |    |
| 2516143018 | Permanent Draft | Ensifer sp. BR816                          | Alphaproteobacteria | Rhizobiales     | Rhizobiaceae       | 6,951,533  | 6,643   | 3   | 0.62 | 6554 | 89  | 9  | 56 | 5419 | 81.57 | 1135 | 17.09 | 4812 | 72.44 | 5586 | 84.09 | 1699 | 25.58 | 3232 | 48.65 | 561 | 8.44  | 303  | 4.56 | 31   |    |
| 637000159  | Finished        | Rhizobium tropici CIAT899                  | Alphaproteobacteria | Rhizobiales     | Rhizobiaceae       | 6,686,334  | 6,494   | 4   | 0.59 | 6432 | 62  | 9  | 53 | 5390 | 83    | 1042 | 16.05 | 4735 | 72.91 | 5364 | 82.6  | 1574 | 24.24 | 3146 | 48.44 | 499 | 7.68  | 340  | 5.24 | 36   |    |
| 2509276019 | Permanent Draft | Mesorhizobium loti MAFF303099              | Alphaproteobacteria | Rhizobiales     | Phyllobacteriaceae | 7,596,297  | 7,356   | 3   | 0.63 | 7272 | 84  | 6  | 53 | 4100 | 55.74 | 3172 | 43.12 | 5144 | 69.93 | 5942 | 80.78 | 1614 | 21.94 | 3267 | 44.41 | 494 | 4.49  | 6.72 | 531  | 7.22 | 49 |
| 2510461076 | Permanent Draft | Rhizobium leguminosarum bv. trifolii TA1   | Alphaproteobacteria | Rhizobiales     | Rhizobiaceae       | 8,618,824  | 8,576   | 6   | 0.61 | 8493 | 83  | 5  | 57 | 6685 | 77.95 | 1808 | 21.08 | 5897 | 68.76 | 6944 | 80.97 | 1838 | 21.43 | 3886 | 45.31 | 727 | 8.48  | 517  | 6.03 | 48   |    |
| 2509276019 | Permanent Draft | Ensifer sp. TW10                           | Alphaproteobacteria | Rhizobiales     | Rhizobiaceae       | 6,802,256  | 6,546   | 57  | 0.62 | 6473 | 73  | 3  | 50 | 5080 | 77.6  | 1393 | 21.28 | 4481 | 68.45 | 5284 | 80.72 | 1572 | 24.01 | 2992 | 45.71 | 539 | 8.23  | 399  | 6.1  | 42   |    |
| 2513237305 | Permanent Draft | Mesorhizobium amorphae CCNWGS0123          | Alphaproteobacteria | Rhizobiales     | Phyllobacteriaceae | 7,293,571  | 7,136   | 274 | 0.63 | 7084 | 52  | 2  | 50 | 5800 | 81.28 | 1284 | 17.99 | 4836 | 67.77 | 5768 | 80.83 | 1589 | 22.27 | 3175 | 44.49 | 573 | 8.03  | 440  | 6.17 | 45   |    |
| 2508501114 | Permanent Draft | Microvirga lotononidis WSM3557             | Alphaproteobacteria | Rhizobiales     | Methylbacteriaceae | 7,082,538  | 7,040   | 18  | 0.63 | 6956 | 84  | 6  | 58 | 4774 | 67.81 | 2182 | 30.99 | 4382 | 62.24 | 5358 | 76.11 | 1559 | 22.14 | 2930 | 41.62 | 656 | 9.32  | 420  | 5.97 | 44   |    |
| 2510065076 | Finished        | Rhizobium leguminosarum bv. trifolii CB782 | Alphaproteobacteria | Rhizobiales     | Rhizobiaceae       | 6,703,653  | 6,559   | 4   | 0.61 | 6472 | 87  | 9  | 50 | 5288 | 80.62 | 1184 | 18.05 | 4756 | 72.51 | 5493 | 83.75 | 1594 | 24.3  | 3180 | 48.48 | 586 | 8.93  | 358  | 5.46 | 33   |    |
| 2515154134 | Permanent Draft | Rhizobium gallicum bv. gallicum R602sp     | Alphaproteobacteria | Rhizobiales     | Rhizobiaceae       | 7,220,242  | 6,977   | 38  | 0.61 | 6900 | 77  | 2  | 53 | 5632 | 80.72 | 1268 | 18.17 | 5033 | 72.14 | 5828 | 83.53 | 1615 | 23.15 | 3356 | 48.1  | 618 | 8.86  | 405  | 5.8  | 40   |    |
| 2515154116 | Permanent Draft | Rhizobium leguminosarum bv. viciae Ps8     | Alphaproteobacteria | Rhizobiales     | Rhizobiaceae       | 7,552,979  | 7,359   | 69  | 0.61 | 7282 | 77  | 2  | 51 | 5825 | 79.15 | 1457 | 19.8  | 5182 | 70.42 | 6056 | 82.29 | 1642 | 22.31 | 3423 | 46.51 | 642 | 8.72  | 476  | 6.47 | 43   |    |
| 639633055  | Finished        | Rhizobium leguminosarum bv. viciae 3841    | Alphaproteobacteria | Rhizobiales     | Rhizobiaceae       | 7,751,309  | 7,357   | 7   | 0.61 | 7276 | 81  | 9  | 52 | 5262 | 71.52 | 2014 | 27.38 | 5191 | 70.56 | 6163 | 83.77 | 1653 | 22.47 | 3550 | 48.25 | 574 | 7.8   | 540  | 7.34 | 52   |    |
| 2551306093 | Permanent Draft | Ensifer melliloti CD438LL                  | Alphaproteobacteria | Rhizobiales     | Rhizobiaceae       | 7,064,773  | 7,332</ |     |      |      |     |    |    |      |       |      |       |      |       |      |       |      |       |      |       |     |       |      |      |      |    |

**Supplementary Table 3. List of NC genomes used for comparative analysis in this study.**

| IMG<br>taxon_oid | Genome Name                                |  |  |  |
|------------------|--------------------------------------------|--|--|--|
| 2515154138       | Aurantimonas ureilytica DSM 18598          |  |  |  |
| 651053055        | Oligotropha carboxidovorans OM4            |  |  |  |
| 2510065041       | Oligotropha carboxidovorans OM5            |  |  |  |
| 2516653076       | Hyphomicrobium sp. 802                     |  |  |  |
| 2545824543       | Hyphomicrobium sp. 99                      |  |  |  |
| 2516653063       | Methyloferula stellata AR4                 |  |  |  |
| 638341134        | Nitrobacter sp. Nb-311A                    |  |  |  |
| 2502376840       | Prosthecomicrobium hirschii ATCC 27832     |  |  |  |
| 639279312        | Rhodopseudomonas palustris BisA53          |  |  |  |
| 637000237        | Rhodopseudomonas palustris BisB18          |  |  |  |
| 637000238        | Rhodopseudomonas palustris BisB5           |  |  |  |
| 637000240        | Rhodopseudomonas palustris HaA2            |  |  |  |
| 2551306146       | Afipia birgiae 34632                       |  |  |  |
| 2517572147       | Amorphus coralli DSM 19760                 |  |  |  |
| 2523533557       | Aurantimonas coralicida DSM 14790          |  |  |  |
| 639857001        | Fulvimarina pelagi HTCC2506                |  |  |  |
| 2514752000       | Nitratireductor aquibiodomus RA22 (Draft1) |  |  |  |
| 2519899619       | Nitratireductor indicus C115               |  |  |  |
| 648028050        | Parvularcula bermudensis HTCC2503          |  |  |  |
| 2511231054       | Pelagibacterium halotolerans B2            |  |  |  |
| 2524614806       | Cucumibacter marinus DSM 18995             |  |  |  |
| 2515154079       | Marteella mediterranea DSM 17316           |  |  |  |
| 650716042        | Hyphomicrobium sp. MC1                     |  |  |  |
| 2545555877       | Rhizobium selenitireducens ATCC BAA-1503   |  |  |  |
| 648028034        | Hyphomicrobium denitrificans ATCC 51888    |  |  |  |
| 637000239        | Rhodopseudomonas palustris CGA009          |  |  |  |
| 649633091        | Rhodopseudomonas palustris DX-1            |  |  |  |
| 2556921669       | Shinella zoogloeoides DD12 (SHLA)          |  |  |  |
| 2537561905       | Afipia broomeae ATCC 49717                 |  |  |  |
| 2537561906       | Afipia clevelandensis ATCC 49720           |  |  |  |
| 2537561903       | Afipia felis felis ATCC 53690              |  |  |  |
| 637000160        | Chelativorans sp. BNC1                     |  |  |  |
| 2537562135       | Hoeflea phototrophica DFL-43               |  |  |  |
| 640753040        | Parvibaculum lavamentivorans DS-1          |  |  |  |
| 638341009        | Aurantimonas manganoxydans SI85-9A1        |  |  |  |
| 2522572188       | Salinarimonas rosea DSM 21201              |  |  |  |
| 2519899590       | Nitratireductor pacificus pht-3B           |  |  |  |
| 2515154196       | Meganema perideroedes DSM 15528            |  |  |  |
| 2505119029       | Hyphomicrobium sp. VS (Draft1)             |  |  |  |
| 2506783045       | Hyphomicrobium denitrificans 1NES1         |  |  |  |
| 2503692000       | Hyphomicrobium sulfonivorans S1 (Draft1)   |  |  |  |
| 2521172694       | Hyphomicrobium zavarzinii ATCC 27496       |  |  |  |
| 2524614770       | Kaistia adipata DSM 17808                  |  |  |  |

|            |                                                 |
|------------|-------------------------------------------------|
| 642555153  | <i>Rhodopseudomonas palustris</i> TIE-1         |
| 648028054  | <i>Starkeya novella</i> DSM 506                 |
| 637000192  | <i>Nitrobacter hamburgensis</i> X14             |
| 637000193  | <i>Nitrobacter winogradskyi</i> Nb-255          |
| 2521172615 | <i>Kaistia granuli</i> DSM 23481                |
| 648276616  | <i>Afipia</i> sp. 1NLS2                         |
| 651324008  | <i>Agrobacterium</i> sp. ATCC 31749             |
| 2505679039 | <i>Aminobacter</i> sp. J15                      |
| 2508501037 | <i>Aminobacter</i> sp. J41                      |
| 2505679040 | <i>Aminobacter</i> sp. J44                      |
| 2517434012 | <i>Ancylobacter</i> sp. FA202                   |
| 2509276017 | <i>Chelativorans</i> sp. J32                    |
| 2551306370 | <i>Chelatococcus</i> sp. GW1                    |
| 2517434009 | <i>Hoeflea</i> sp. 108                          |
| 2551306656 | <i>Methylobacterium</i> sp. B1                  |
| 2546826724 | <i>Methylobacterium</i> sp. EUR3 AL-11          |
| 2510065046 | <i>Methylocapsa acidiphila</i> B2               |
| 643348565  | <i>Methylocella silvestris</i> BL2, DSM 15510   |
| 650716069  | <i>Oligotropha carboxidovorans</i> OM5          |
| 2551306133 | <i>Pseudaminobacter salicylatoxidans</i> KCT001 |
| 2537562120 | <i>Rhizobium lupini</i> HPC(L)                  |
| 2551306670 | <i>Rhodopseudomonas</i> sp. B29                 |
| 2517093040 | <i>Xanthobacter</i> sp. 126                     |
| 2519899517 | Xanthobacteraceae bacterium 501b                |
| 2531839408 | <i>Burkholderia cenocepacia</i> H111            |
| 638341037  | <i>Burkholderia pseudomallei</i> 1710a          |

**SUPPLEMENTARY TABLE 4. List of over-represented Pfams and criteria used for delineation of "Plant Interaction Determinants" (PID)**

| Pfam ID | Pfam Name                                                            | RNB<br>MEDIAN | NC<br>MEDIAN | Transcript<br>induction<br>in nodule | LPD | % total<br>seqs with<br>SignalP | Antismash<br>Pfam<br>(Secondary<br>metabolite) | PID |
|---------|----------------------------------------------------------------------|---------------|--------------|--------------------------------------|-----|---------------------------------|------------------------------------------------|-----|
| PF00024 | PAN domain                                                           | 1             | 0            | y                                    | EUK | 87.80                           |                                                | PID |
| PF00042 | Globin                                                               | 1             | 0            | y                                    |     | 0.00                            | y                                              | PID |
| PF00078 | Reverse transcriptase (RNA-dependent DNA polymerase)                 | 2             | 0            | y                                    |     | 0.00                            | y                                              | PID |
| PF00080 | Copper/zinc superoxide dismutase (SODC)                              | 1             | 0            | y                                    |     | 87.16                           |                                                | PID |
| PF00101 | Ribulose biphosphate carboxylase, small chain                        | 1             | 0            | y                                    |     | 0.00                            |                                                | PID |
| PF00142 | 4Fe-4S iron sulfur cluster binding proteins, NifH/frxC family        | 1             | 0            | y                                    |     | 0.00                            | y                                              | PID |
| PF00194 | Eukaryotic-type carbonic anhydrase                                   | 1             | 0            | y                                    |     | 78.70                           |                                                | PID |
| PF00232 | Glycosyl hydrolase family 1                                          | 1             | 0            | y                                    |     | 16.06                           | y                                              | PID |
| PF00265 | Thymidine kinase                                                     | 1             | 0            | y                                    |     | 0.00                            |                                                | PID |
| PF00450 | Serine carboxypeptidase                                              | 1             | 0            |                                      | EUK | 75.36                           |                                                | PID |
| PF00532 | Periplasmic binding proteins and sugar binding domain of LacI family | 1             | 0            | y                                    |     | 48.83                           | y                                              | PID |
| PF00614 | Phospholipase D Active site motif                                    | 1             | 0            | y                                    |     | 0.00                            | y                                              | PID |
| PF00685 | Sulfotransferase domain ( <i>presumably NodH</i> )                   | 1             | 0            | y                                    |     | 0.00                            | y                                              | PID |
| PF00703 | Glycosyl hydrolases family 2                                         | 1             | 0            | y                                    |     | 0.00                            | y                                              | PID |
| PF00728 | Glycosyl hydrolase family 20, catalytic domain                       | 1             | 0            | y                                    |     | 0.00                            | y                                              | PID |
| PF00743 | Flavin-binding monooxygenase-like                                    | 1             | 0            | y                                    |     | 1.26                            | y                                              | PID |
| PF01028 | Eukaryotic DNA topoisomerase I, catalytic core                       | 1             | 0            | y                                    |     | 0.00                            | y                                              | PID |
| PF01219 | Prokaryotic diacylglycerol kinase                                    | 1             | 0            | y                                    |     | 0.00                            | y                                              | PID |
| PF01501 | Glycosyl transferase family 8                                        | 1             | 0            | y                                    |     | 0.00                            | y                                              | PID |
| PF01610 | Transposase                                                          | 1             | 0            | y                                    |     | 0.00                            | y                                              | PID |
| PF01663 | Type I phosphodiesterase / nucleotide pyrophosphatase                | 1             | 0            | y                                    |     | 36.97                           | y                                              | PID |
| PF01928 | CYTH domain                                                          | 1             | 0            | y                                    |     | 0.00                            | y                                              | PID |
| PF01989 | Protein of unknown function DUF126                                   | 1             | 0            | y                                    |     | 0.00                            |                                                | PID |
| PF02133 | Permease for cytosine/purines, uracil, thiamine, allantoin           | 1             | 0            | y                                    |     | 0.00                            | y                                              | PID |
| PF02156 | Glycosyl hydrolase family 26                                         | 1             | 0            | y                                    |     | 75.19                           | y                                              | PID |
| PF02230 | Phospholipase/Carboxylesterase                                       | 1             | 0            | y                                    |     | 3.88                            | y                                              | PID |
| PF02474 | Nodulation protein A (NodA)                                          | 1             | 0            | y                                    | y   | 0.00                            |                                                | PID |
| PF02543 | Carbamoyltransferase                                                 | 1             | 0            | y                                    |     | 0.00                            | y                                              | PID |
| PF02788 | Ribulose biphosphate carboxylase large chain, N-terminal domain      | 1             | 0            | y                                    |     | 0.00                            |                                                | PID |
| PF02979 | Nitrile hydratase, alpha chain                                       | 1             | 0            | y                                    |     | 0.00                            | y                                              | PID |
| PF03206 | Nitrogen fixation protein NifW                                       | 1             | 0            | y                                    |     | 0.00                            |                                                | PID |
| PF03264 | NapC/NirT cytochrome c family, N-terminal region                     | 1             | 0            | y                                    |     | 0.00                            |                                                | PID |
| PF03270 | Protein of unknown function, DUF269 ( <i>found in Nif-operon</i> )   | 1             | 0            | y                                    |     | 0.00                            |                                                | PID |
| PF03389 | MobA/MobL family                                                     | 2             | 0            | y                                    |     | 0.00                            |                                                | PID |

|         |                                                            |   |   |   |      |       |   |     |
|---------|------------------------------------------------------------|---|---|---|------|-------|---|-----|
| PF03625 | Domain of unknown function DUF302                          | 1 | 0 | y |      | 24.81 |   | PID |
| PF03640 | Secreted repeat of unknown function                        | 1 | 0 | y |      | 93.10 | y | PID |
| PF03775 | Septum formation inhibitor MinC, C-terminal domain         | 1 | 0 | y |      | 0.00  | y | PID |
| PF03776 | Septum formation topological specificity factor MinE       | 1 | 0 | y |      | 0.00  | y | PID |
| PF03841 | L-seryl-tRNA selenium transferase                          | 1 | 0 | y |      | 0.00  | y | PID |
| PF03932 | CutC family                                                | 1 | 0 | y |      | 0.89  |   | PID |
| PF03975 | CheD chemotactic sensory transduction                      | 1 | 0 | y |      | 0.00  |   | PID |
| PF04140 | Isoprenylcysteine carboxyl methyltransferase (ICMT) family | 1 | 0 | y |      | 0.00  | y | PID |
| PF04204 | Homoserine O-succinyltransferase                           | 1 | 0 | y |      | 0.00  |   | PID |
| PF04209 | homogentisate 1,2-dioxygenase                              | 1 | 0 | y |      | 0.00  | y | PID |
| PF04214 | Protein of unknown function, DUF                           | 1 | 0 | y |      | 80.73 |   | PID |
| PF04227 | Indigoidine synthase A like protein                        | 1 | 0 | y |      | 0.81  | y | PID |
| PF04234 | CopC domain                                                | 1 | 0 | y |      | 75.93 | y | PID |
| PF04250 | Protein of unknown function (DUF429)                       | 1 | 0 | y |      | 0.00  |   | PID |
| PF04285 | Protein of unknown function (DUF444)                       | 1 | 0 | y |      | 0.00  |   | PID |
| PF04293 | SpoVR like protein                                         | 1 | 0 | y |      | 0.00  |   | PID |
| PF04303 | PrpF protein                                               | 1 | 0 | y |      | 0.00  | y | PID |
| PF04319 | NifZ domain                                                | 1 | 0 | y |      | 0.00  |   | PID |
| PF04392 | ABC transporter substrate binding protein                  | 1 | 0 | y |      | 42.96 |   | PID |
| PF04616 | Glycosyl hydrolases family 43                              | 1 | 0 | y |      | 0.00  | y | PID |
| PF04655 | Aminoglycoside/hydroxyurea antibiotic resistance kinase    | 1 | 0 | y |      | 0.00  | y | PID |
| PF04891 | NifQ                                                       | 1 | 0 | y |      | 0.00  |   | PID |
| PF05082 | Rop-like #(found in Nif-operon)                            | 1 | 0 | y |      | 0.00  |   | PID |
| PF05114 | Protein of unknown function (DUF692)                       | 1 | 0 | y |      | 0.00  | y | PID |
| PF05231 | MASE1                                                      | 1 | 0 | y |      | 0.00  | y | PID |
| PF05368 | NmrA-like family                                           | 2 | 0 | y |      | 0.00  | y | PID |
| PF05401 | Nodulation protein S (NodS)                                | 1 | 0 | y |      | 0.00  |   | PID |
| PF05430 | S-adenosyl-L-methionine-dependent methyltransferase        | 1 | 0 | y |      | 0.00  |   | PID |
| PF05433 | Glycine zipper 2TM domain                                  | 1 | 0 | y |      | 80.00 |   | PID |
| PF05559 | Protein of unknown function (DUF763)                       | 1 | 0 | y | ARCH | 0.00  |   | PID |
| PF05610 | Protein of unknown function (DUF779)                       | 1 | 0 | y |      | 0.00  | y | PID |
| PF05787 | Bacterial protein of unknown function (DUF839)             | 1 | 0 | y |      | 5.00  | y | PID |
| PF05962 | HutD                                                       | 1 | 0 | y |      | 0.00  |   | PID |
| PF05992 | SbmA/BacA-like family                                      | 1 | 0 | y |      | 0.00  |   | PID |
| PF06037 | Bacterial protein of unknown function (DUF922)             | 2 | 0 |   | y    | 65.93 |   | PID |
| PF06089 | L-asparaginase II                                          | 1 | 0 | y |      | 0.00  |   | PID |
| PF06191 | Protein of unknown function (DUF995)                       | 1 | 0 | y | y    | 71.36 |   | PID |
| PF06202 | Amylo-alpha-1,6-glucosidase                                | 1 | 0 | y |      | 0.00  |   | PID |
| PF06210 | Protein of unknown function (DUF1003)                      | 1 | 0 | y |      | 0.00  |   | PID |

|                |                                                           |   |   |   |   |       |   |     |
|----------------|-----------------------------------------------------------|---|---|---|---|-------|---|-----|
| <b>PF06224</b> | Winged helix DNA-binding domain                           | 1 | 0 | y |   | 0.00  | y | PID |
| <b>PF06243</b> | Phenylacetic acid degradation B                           | 1 | 0 | y |   | 0.00  | y | PID |
| <b>PF06348</b> | Protein of unknown function (DUF1059)                     | 1 | 0 | y |   | 0.00  |   | PID |
| <b>PF06412</b> | Conjugal transfer protein TraD                            | 1 | 0 | y |   | 0.00  |   | PID |
| <b>PF06441</b> | Epoxide hydrolase N terminus                              | 2 | 0 | y |   | 19.38 | y | PID |
| <b>PF06684</b> | Amino acid synthesis                                      | 1 | 0 | y |   | 0.00  |   | PID |
| <b>PF06718</b> | Protein of unknown function (DUF1203)                     | 1 | 0 | y |   | 0.00  |   | PID |
| <b>PF06751</b> | Ethanolamine ammonia lyase large subunit (EutB)           | 1 | 0 | y |   | 0.00  |   | PID |
| <b>PF06772</b> | Bacterial low temperature requirement A protein (LtrA)    | 1 | 0 | y |   | 0.00  |   | PID |
| <b>PF06792</b> | Uncharacterised protein family (UPF0261)                  | 1 | 0 | y |   | 0.00  |   | PID |
| <b>PF06798</b> | PrkA serine protein kinase C-terminal domain              | 1 | 0 | y |   | 0.00  |   | PID |
| <b>PF06897</b> | Protein of unknown function (DUF1269)                     | 1 | 0 | y |   | 0.00  |   | PID |
| <b>PF06988</b> | NifT/FixU protein                                         | 1 | 0 | y |   | 0.00  |   | PID |
| <b>PF07063</b> | Domain of unknown function (DUF1338)                      | 1 | 0 | y |   | 0.00  |   | PID |
| <b>PF07076</b> | Protein of unknown function (DUF1344)                     | 1 | 0 | y | y | 96.99 |   | PID |
| <b>PF07110</b> | EthD domain                                               | 1 | 0 | y |   | 0.00  | y | PID |
| <b>PF07182</b> | Protein of unknown function (DUF1402)                     | 1 | 0 |   | y | 93.75 |   | PID |
| <b>PF07235</b> | Protein of unknown function (DUF1427)                     | 1 | 0 | y |   | 0.00  |   | PID |
| <b>PF07311</b> | Dodecin                                                   | 1 | 0 | y |   | 0.00  |   | PID |
| <b>PF07332</b> | Protein of unknown function (DUF1469)                     | 1 | 0 | y |   | 0.00  | y | PID |
| <b>PF07336</b> | Protein of unknown function (DUF1470)                     | 1 | 0 | y |   | 0.00  | y | PID |
| <b>PF07369</b> | Protein of unknown function (DUF1488)                     | 1 | 0 | y |   | 0.00  |   | PID |
| <b>PF07394</b> | Protein of unknown function (DUF1501)                     | 1 | 0 | y |   | 37.14 |   | PID |
| <b>PF07617</b> | Protein of unknown function (DUF1579)                     | 1 | 0 | y |   | 0.00  | y | PID |
| <b>PF07670</b> | Nucleoside recognition                                    | 1 | 0 | y |   | 0.00  |   | PID |
| <b>PF07820</b> | TraC-like protein                                         | 1 | 0 | y | y | 0.00  |   | PID |
| <b>PF07944</b> | Putative glycosyl hydrolase of unknown function (DUF1680) | 1 | 0 | y |   | 0.68  | y | PID |
| <b>PF07987</b> | Domain of unknown function (DUF1775)                      | 1 | 0 | y |   | 97.63 |   | PID |
| <b>PF07996</b> | Type IV secretion system proteins                         | 1 | 0 | y |   | 90.91 |   | PID |
| <b>PF08003</b> | Protein of unknown function (DUF1698)                     | 1 | 0 | y |   | 0.00  |   | PID |
| <b>PF08013</b> | Tagatose 6 phosphate kinase                               | 1 | 0 | y |   | 0.00  | y | PID |
| <b>PF08031</b> | Berberine and berberine like                              | 1 | 0 | y |   | 0.56  | y | PID |
| <b>PF08298</b> | PrkA AAA domain                                           | 1 | 0 | y |   | 0.00  |   | PID |
| <b>PF08495</b> | FIST N domain                                             | 1 | 0 | y |   | 0.00  |   | PID |
| <b>PF08521</b> | Two-component sensor kinase N-terminal                    | 1 | 0 | y |   | 0.39  |   | PID |
| <b>PF08713</b> | DNA alkylation repair enzyme                              | 1 | 0 | y |   | 0.00  | y | PID |
| <b>PF08811</b> | Protein of unknown function (DUF1800)                     | 1 | 0 | y |   | 3.70  |   | PID |
| <b>PF08837</b> | Protein of unknown function (DUF1810)                     | 1 | 0 | y |   | 0.00  |   | PID |
| <b>PF08843</b> | Nucleotidyl transferase of unknown function (DUF1814)     | 1 | 0 | y |   | 0.00  | y | PID |

|         |                                                                 |   |   |   |          |       |   |     |
|---------|-----------------------------------------------------------------|---|---|---|----------|-------|---|-----|
| PF09351 | Domain of unknown function (DUF1993)                            | 1 | 0 | y |          | 0.00  |   | PID |
| PF09364 | XFP N-terminal domain                                           | 1 | 0 | y |          | 0.00  | y | PID |
| PF09370 | TIM-barrel signal transduction protein                          | 1 | 0 | y |          | 0.00  |   | PID |
| PF09423 | PhoD-like phosphatase                                           | 1 | 0 | y |          | 26.03 | y | PID |
| PF09490 | Probable cobalt transporter subunit (CbtA)                      | 1 | 0 | y |          | 9.60  |   | PID |
| PF09587 | Bacterial capsule synthesis protein PGA_cap                     | 1 | 0 | y |          | 7.10  | y | PID |
| PF09835 | Uncharacterized protein conserved in bacteria (DUF2062)         | 1 | 0 | y |          | 0.92  |   | PID |
| PF09836 | Uncharacterized protein conserved in bacteria (DUF2063)         | 1 | 0 | y |          | 0.93  |   | PID |
| PF09857 | Uncharacterized protein conserved in bacteria (DUF2084)         | 1 | 0 | y |          | 0.00  |   | PID |
| PF09865 | Predicted periplasmic protein (DUF2092)                         | 1 | 0 | y |          | 41.46 |   | PID |
| PF09928 | Predicted small integral membrane protein (DUF2160)             | 1 | 0 | y |          | 0.00  |   | PID |
| PF09948 | Predicted metal-binding integral membrane protein (DUF2182)     | 1 | 0 | y |          | 0.71  | y | PID |
| PF09992 | Predicted periplasmic protein (DUF2233)                         | 1 | 0 | y |          | 75.21 | y | PID |
| PF10005 | Uncharacterized protein conserved in bacteria (DUF2248)         | 1 | 0 | y |          | 0.00  |   | PID |
| PF10027 | Predicted integral membrane protein (DUF2269)                   | 1 | 0 | y |          | 0.00  | y | PID |
| PF10028 | Predicted integral membrane protein (DUF2270)                   | 1 | 0 | y |          | 0.00  |   | PID |
| PF10041 | Uncharacterized conserved protein (DUF2277)                     | 1 | 0 | y |          | 0.00  |   | PID |
| PF10054 | Predicted periplasmic lipoprotein (DUF2291)                     | 1 | 0 | y |          | 9.09  |   | PID |
| PF10095 | Uncharacterized protein conserved in bacteria (DUF2333)         | 1 | 0 | y |          | 0.00  |   | PID |
| PF10101 | Predicted membrane protein (DUF2339)                            | 1 | 0 | y |          | 0.00  |   | PID |
| PF10262 | Rdx family                                                      | 1 | 0 | y |          | 0.00  |   | PID |
| PF10423 | Bacterial AMP nucleoside phosphorylase N-terminus               | 1 | 0 | y |          | 0.00  | y | PID |
| PF10503 | Esterase PHB depolymerase                                       | 1 | 0 | y |          | 11.38 | y | PID |
| PF10672 | S-adenosylmethionine-dependent methyltransferase                | 1 | 0 | y |          | 0.00  |   | PID |
| PF10931 | Protein of unknown function (DUF2735)                           | 1 | 0 | y | y        | 0.00  |   | PID |
| PF11154 | Protein of unknown function (DUF2934)                           | 3 | 0 | y |          | 0.00  |   | PID |
| PF11339 | Protein of unknown function (DUF3141)                           | 1 | 0 | y |          | 0.00  |   | PID |
| PF11373 | Protein of unknown function (DUF3175)                           | 1 | 0 | y |          | 0.00  |   | PID |
| PF11391 | Protein of unknown function (DUF2798)                           | 1 | 0 | y |          | 0.00  |   | PID |
| PF11450 | Protein of unknown function (DUF3008)                           | 1 | 0 | y | Brucella | 0.00  |   | PID |
| PF11453 | Protein of unknown function (DUF2950)                           | 1 | 0 | y |          | 73.40 |   | PID |
| PF11563 | Protoglobin                                                     | 1 | 0 | y |          | 0.00  |   | PID |
| PF11684 | Protein of unknown function (DUF2380)                           | 1 | 0 |   | y        | 83.85 |   | PID |
| PF11737 | Protein of unknown function (DUF3300)                           | 1 | 0 | y |          | 73.86 |   | PID |
| PF11776 | Domain of unknown function (DUF3315)                            | 1 | 0 | y |          | 98.39 |   | PID |
| PF11812 | Domain of unknown function (DUF3333)                            | 1 | 0 | y |          | 0.00  |   | PID |
| PF11844 | Domain of unknown function (DUF3364) ( <i>presumably nifK</i> ) | 1 | 0 | y |          | 0.00  |   | PID |
| PF11845 | Protein of unknown function (DUF3365)                           | 1 | 0 | y |          | 42.86 |   | PID |
| PF11899 | Protein of unknown function (DUF3419)                           | 1 | 0 | y |          | 0.00  |   | PID |

|         |                                                                        |   |   |   |     |       |   |     |
|---------|------------------------------------------------------------------------|---|---|---|-----|-------|---|-----|
| PF11927 | Protein of unknown function (DUF3445)                                  | 1 | 0 | y |     | 0.00  | y | PID |
| PF12086 | Protein of unknown function (DUF3563)                                  | 1 | 0 | y |     | 0.00  |   | PID |
| PF12244 | Protein of unknown function (DUF3606)                                  | 2 | 0 | y |     | 0.00  |   | PID |
| PF12277 | Protein of unknown function (DUF3618)                                  | 1 | 0 | y |     | 0.00  | y | PID |
| PF12281 | Protein of unknown function (DUF3620)                                  | 1 | 0 | y |     | 0.00  |   | PID |
| PF12391 | Protocatechuate 3,4-dioxygenase beta subunit N terminal                | 1 | 0 | y |     | 0.00  | y | PID |
| PF12464 | Maltose acetyltransferase                                              | 1 | 0 | y |     | 0.00  | y | PID |
| PF12501 | Phosphate ATP-binding cassette transporter                             | 1 | 0 | y |     | 0.00  |   | PID |
| PF12573 | 2-oxoisovalerate dehydrogenase E1 alpha subunit N terminal             | 1 | 0 | y |     | 0.00  |   | PID |
| PF12893 | Putative lumazine-binding                                              | 1 | 0 | y |     | 0.00  |   | PID |
| PF12900 | Pyridoxamine 5'-phosphate oxidase                                      | 1 | 0 | y |     | 0.00  | y | PID |
| PF13338 | Domain of unknown function (DUF4095)                                   | 1 | 0 | y |     | 0.00  |   | PID |
| PF13430 | Domain of unknown function (DUF4112)                                   | 1 | 0 | y |     | 0.00  |   | PID |
| PF13434 | L-lysine 6-monooxygenase (NADPH-requiring)                             | 1 | 0 | y |     | 0.00  | y | PID |
| PF13459 | 4Fe-4S single cluster domain                                           | 1 | 0 | y |     | 0.00  | y | PID |
| PF13469 | Sulfotransferase family                                                | 1 | 0 | y |     | 0.00  | y | PID |
| PF13474 | SnoL-like domain                                                       | 2 | 0 | y |     | 3.64  | y | PID |
| PF13499 | EF-hand domain pair                                                    | 1 | 0 | y | EUK | 48.65 | y | PID |
| PF13506 | Glycosyl transferase family 21                                         | 1 | 0 | y |     | 5.21  | y | PID |
| PF13515 | Fusaric acid resistance protein-like                                   | 1 | 0 | y |     | 0.00  | y | PID |
| PF13518 | Helix-turn-helix domain                                                | 1 | 0 | y |     | 0.00  | y | PID |
| PF13577 | SnoL-like domain                                                       | 1 | 0 | y |     | 10.53 | y | PID |
| PF13591 | MerR HTH family regulatory protein                                     | 1 | 0 | y |     | 0.00  |   | PID |
| PF13619 | KTSC domain                                                            | 1 | 0 | y |     | 2.51  |   | PID |
| PF13657 | HipA N-terminal domain                                                 | 1 | 0 | y |     | 0.38  |   | PID |
| PF13767 | Domain of unknown function (DUF4168)                                   | 1 | 0 | y |     | 92.94 |   | PID |
| PF13781 | DoxX-like family                                                       | 1 | 0 | y |     | 0.00  |   | PID |
| PF13806 | Rieske-like [2Fe-2S] domain                                            | 1 | 0 | y |     | 0.00  | y | PID |
| PF13823 | Alcohol dehydrogenase GroES-associated                                 | 1 | 0 | y |     | 0.00  |   | PID |
| PF13936 | Helix-turn-helix domain                                                | 1 | 0 | y |     | 0.00  | y | PID |
| PF14486 | Domain of unknown function (DUF4432)                                   | 1 | 0 | y |     | 0.00  |   | PID |
| PF14742 | N-terminal domain of (some) glycogen debranching enzymes               | 1 | 0 | y |     | 0.00  |   | PID |
| PF14907 | Uncharacterised nucleotidyltransferase                                 | 1 | 0 | y |     | 0.00  | y | PID |
| PF00089 | Trypsin                                                                | 1 | 0 |   |     | 75.16 | y |     |
| PF00148 | Nitrogenase component 1 type Oxidoreductase ( <i>presumably NifD</i> ) | 4 | 0 |   |     | 0.00  | y |     |
| PF00150 | Cellulase (glycosyl hydrolase family 5)                                | 1 | 0 |   |     | 76.62 | y |     |
| PF00183 | Hsp90 protein                                                          | 1 | 0 |   |     | 0.00  | y |     |
| PF00221 | Aromatic amino acid lyase                                              | 3 | 0 |   |     | 3.39  | y |     |
| PF00282 | Pyridoxal-dependent decarboxylase conserved domain                     | 1 | 0 |   |     | 0.00  | y |     |

|         |                                                       |   |   |  |     |       |   |  |
|---------|-------------------------------------------------------|---|---|--|-----|-------|---|--|
| PF00365 | Phosphofructokinase                                   | 1 | 0 |  |     | 1.92  | y |  |
| PF00498 | FHA domain                                            | 1 | 0 |  |     | 0.00  | y |  |
| PF00536 | SAM domain (Sterile alpha motif)                      | 1 | 0 |  | EUK | 0.00  |   |  |
| PF00585 | C-terminal regulatory domain of Threonine dehydratase | 1 | 0 |  |     | 0.00  |   |  |
| PF00595 | PDZ domain (Also known as DHR or GLGF)                | 1 | 0 |  |     | 75.63 |   |  |
| PF00668 | Condensation domain                                   | 1 | 0 |  |     | 0.00  | y |  |
| PF00722 | Glycosyl hydrolases family 16                         | 1 | 0 |  |     | 36.26 | y |  |
| PF00860 | Permease family                                       | 1 | 0 |  |     | 0.00  | y |  |
| PF00872 | Transposase, Mutator family                           | 5 | 0 |  |     | 0.09  | y |  |
| PF00891 | O-methyltransferase                                   | 1 | 0 |  |     | 0.00  | y |  |
| PF00962 | Adenosine/AMP deaminase                               | 1 | 0 |  |     | 0.00  | y |  |
| PF01156 | Inosine-uridine preferring nucleoside hydrolase       | 3 | 0 |  |     | 1.66  | y |  |
| PF01175 | Urocanase                                             | 1 | 0 |  |     | 0.00  |   |  |
| PF01183 | Glycosyl hydrolases family 25                         | 3 | 0 |  |     | 52.88 | y |  |
| PF01232 | Mannitol dehydrogenase Rossmann domain                | 2 | 0 |  |     | 0.00  |   |  |
| PF01244 | Membrane dipeptidase (Peptidase family M19)           | 1 | 0 |  |     | 0.00  | y |  |
| PF01276 | Orn/Lys/Arg decarboxylase, major domain               | 1 | 0 |  |     | 0.00  | y |  |
| PF01609 | Transposase DDE domain                                | 4 | 0 |  |     | 0.19  | y |  |
| PF01865 | Protein of unknown function DUF47                     | 1 | 0 |  |     | 0.00  |   |  |
| PF01869 | BadF/BadG/BcrA/BcrD ATPase family                     | 1 | 0 |  |     | 0.00  |   |  |
| PF01896 | Eukaryotic and archaeal DNA primase small subunit     | 1 | 0 |  |     | 0.00  |   |  |
| PF01963 | TraB family                                           | 1 | 0 |  |     | 3.94  |   |  |
| PF02056 | Family 4 glycosyl hydrolase                           | 2 | 0 |  |     | 0.00  |   |  |
| PF02073 | Thermophilic metalloprotease (M29)                    | 1 | 0 |  |     | 0.00  |   |  |
| PF02129 | X-Pro dipeptidyl-peptidase (S15 family)               | 1 | 0 |  |     | 3.24  | y |  |
| PF02211 | Nitrile hydratase beta subunit                        | 2 | 0 |  |     | 0.00  | y |  |
| PF02274 | Amidinotransferase                                    | 1 | 0 |  |     | 0.00  | y |  |
| PF02361 | Cobalt transport protein                              | 1 | 0 |  |     | 0.00  | y |  |
| PF02436 | Conserved carboxylase domain                          | 1 | 0 |  |     | 0.00  |   |  |
| PF02449 | Beta-galactosidase                                    | 1 | 0 |  |     | 0.00  | y |  |
| PF02502 | Ribose/Galactose Isomerase                            | 1 | 0 |  |     | 0.00  | y |  |
| PF02579 | Dinitrogenase iron-molybdenum cofactor                | 2 | 0 |  |     | 0.00  |   |  |
| PF02588 | Uncharacterized BCR, YitT family COG1284              | 1 | 0 |  |     | 0.00  |   |  |
| PF02614 | Glucuronate isomerase                                 | 1 | 0 |  |     | 0.00  |   |  |
| PF02624 | YcaO-like family                                      | 2 | 0 |  |     | 0.00  | y |  |
| PF02668 | Taurine catabolism dioxygenase TauD, TfdA family      | 1 | 0 |  |     | 0.00  | y |  |
| PF02690 | Na <sup>+</sup> /Pi-cotransporter                     | 1 | 0 |  |     | 0.00  |   |  |
| PF02733 | Dak1 domain                                           | 3 | 0 |  |     | 0.00  | y |  |
| PF02734 | DAK2 domain                                           | 3 | 0 |  |     | 0.50  | y |  |

|                |                                                               |   |   |  |     |       |   |  |
|----------------|---------------------------------------------------------------|---|---|--|-----|-------|---|--|
| <b>PF02743</b> | Cache domain                                                  | 3 | 0 |  |     | 2.42  | y |  |
| <b>PF02796</b> | Helix-turn-helix domain of resolvase                          | 1 | 0 |  |     | 0.00  |   |  |
| <b>PF02805</b> | Metal binding domain of Ada                                   | 1 | 0 |  |     | 0.00  | y |  |
| <b>PF02836</b> | Glycosyl hydrolases family 2, TIM barrel domain               | 1 | 0 |  |     | 0.00  | y |  |
| <b>PF02837</b> | Glycosyl hydrolases family 2, sugar binding domain            | 2 | 0 |  |     | 0.00  | y |  |
| <b>PF02909</b> | Tetracyclin repressor, C-terminal all-alpha domain            | 1 | 0 |  |     | 0.00  | y |  |
| <b>PF03050</b> | Transposase IS66 family                                       | 7 | 0 |  |     | 0.00  | y |  |
| <b>PF03180</b> | NLPA lipoprotein                                              | 1 | 0 |  |     | 84.25 | y |  |
| <b>PF03412</b> | Peptidase C39 family                                          | 1 | 0 |  |     | 6.93  | y |  |
| <b>PF03428</b> | Replication protein C N-terminal domain                       | 2 | 0 |  | y   | 0.00  |   |  |
| <b>PF03479</b> | Domain of unknown function (DUF296)                           | 1 | 0 |  |     | 2.40  |   |  |
| <b>PF03594</b> | Benzoate membrane transport protein                           | 1 | 0 |  |     | 0.00  | y |  |
| <b>PF03681</b> | Uncharacterised protein family (UPF0150)                      | 1 | 0 |  |     | 0.00  |   |  |
| <b>PF03693</b> | Uncharacterised protein family (UPF0156)                      | 3 | 0 |  |     | 0.00  |   |  |
| <b>PF03704</b> | Bacterial transcriptional activator domain                    | 1 | 0 |  |     | 0.00  | y |  |
| <b>PF03709</b> | Orn/Lys/Arg decarboxylase, N-terminal domain                  | 1 | 0 |  |     | 0.00  | y |  |
| <b>PF03711</b> | Orn/Lys/Arg decarboxylase, C-terminal domain                  | 1 | 0 |  |     | 0.00  | y |  |
| <b>PF03779</b> | SPW repeat                                                    | 1 | 0 |  |     | 0.00  |   |  |
| <b>PF03786</b> | D-mannonate dehydratase (UxuA)                                | 1 | 0 |  |     | 0.00  | y |  |
| <b>PF03894</b> | D-xylulose 5-phosphate/D-fructose 6-phosphate phosphoketolase | 1 | 0 |  |     | 0.00  | y |  |
| <b>PF03922</b> | OmpW family                                                   | 1 | 0 |  |     | 88.11 |   |  |
| <b>PF03924</b> | CHASE domain                                                  | 1 | 0 |  |     | 2.26  |   |  |
| <b>PF04012</b> | PspA/IM30 family                                              | 1 | 0 |  |     | 0.00  |   |  |
| <b>PF04120</b> | Low affinity iron permease                                    | 1 | 0 |  |     | 0.00  | y |  |
| <b>PF04134</b> | Protein of unknown function, DUF393                           | 1 | 0 |  |     | 0.00  | y |  |
| <b>PF04198</b> | Putative sugar-binding domain                                 | 5 | 0 |  |     | 0.00  | y |  |
| <b>PF04230</b> | Polysaccharide pyruvyl transferase                            | 2 | 0 |  |     | 0.00  | y |  |
| <b>PF04237</b> | YjbR                                                          | 1 | 0 |  |     | 0.00  | y |  |
| <b>PF04239</b> | Protein of unknown function (DUF421)                          | 1 | 0 |  |     | 0.00  | y |  |
| <b>PF04263</b> | Thiamin pyrophosphokinase, catalytic domain                   | 1 | 0 |  |     | 0.97  |   |  |
| <b>PF04265</b> | Thiamin pyrophosphokinase, vitamin B1 binding domain          | 1 | 0 |  |     | 1.09  |   |  |
| <b>PF04299</b> | Putative FMN-binding domain                                   | 1 | 0 |  |     | 0.00  | y |  |
| <b>PF04305</b> | Protein of unknown function (DUF455)                          | 1 | 0 |  |     | 0.00  |   |  |
| <b>PF04332</b> | Protein of unknown function (DUF475)                          | 1 | 0 |  |     | 0.00  | y |  |
| <b>PF04397</b> | LytTr DNA-binding domain                                      | 1 | 0 |  |     | 0.00  | y |  |
| <b>PF04412</b> | Protein of unknown function (DUF521)                          | 1 | 0 |  | EUK | 0.00  |   |  |
| <b>PF04444</b> | Catechol dioxygenase N terminus                               | 2 | 0 |  |     | 0.00  | y |  |
| <b>PF04463</b> | Protein of unknown function (DUF523)                          | 1 | 0 |  |     | 0.00  |   |  |
| <b>PF04471</b> | Restriction endonuclease                                      | 1 | 0 |  |     | 0.00  | y |  |

|                |                                                         |   |   |  |   |       |   |  |
|----------------|---------------------------------------------------------|---|---|--|---|-------|---|--|
| <b>PF04717</b> | Phage-related baseplate assembly protein                | 1 | 0 |  |   | 0.00  | y |  |
| <b>PF04892</b> | VanZ like family                                        | 1 | 0 |  |   | 2.96  | y |  |
| <b>PF04952</b> | Succinylglutamate desuccinylase / Aspartoacylase family | 2 | 0 |  |   | 1.25  |   |  |
| <b>PF04954</b> | Siderophore-interacting protein                         | 1 | 0 |  |   | 0.00  | y |  |
| <b>PF04962</b> | Kdul/IolB family                                        | 2 | 0 |  |   | 0.00  |   |  |
| <b>PF04965</b> | Gene 25-like lysozyme                                   | 1 | 0 |  |   | 0.00  | y |  |
| <b>PF04982</b> | HPP family                                              | 1 | 0 |  |   | 0.00  | y |  |
| <b>PF05014</b> | Nucleoside 2-deoxyribosyltransferase                    | 1 | 0 |  |   | 0.00  | y |  |
| <b>PF05025</b> | RbsD / FucU transport protein family                    | 2 | 0 |  |   | 0.00  |   |  |
| <b>PF05035</b> | 2-keto-3-deoxy-galactonokinase                          | 1 | 0 |  |   | 0.00  |   |  |
| <b>PF05088</b> | Bacterial NAD-glutamate dehydrogenase                   | 1 | 0 |  |   | 0.00  |   |  |
| <b>PF05138</b> | Phenylacetic acid catabolic protein                     | 2 | 0 |  |   | 0.00  | y |  |
| <b>PF05139</b> | Erythromycin esterase                                   | 1 | 0 |  |   | 0.00  | y |  |
| <b>PF05171</b> | Haemin-degrading HemS.ChuX domain                       | 1 | 0 |  |   | 0.00  |   |  |
| <b>PF05228</b> | CHASE4 domain                                           | 1 | 0 |  |   | 0.90  | y |  |
| <b>PF05336</b> | Domain of unknown function (DUF718)                     | 1 | 0 |  |   | 0.00  |   |  |
| <b>PF05360</b> | yiaA/B two helix domain                                 | 1 | 0 |  |   | 0.00  |   |  |
| <b>PF05406</b> | WGR domain                                              | 1 | 0 |  |   | 0.00  | y |  |
| <b>PF05425</b> | Copper resistance protein D                             | 1 | 0 |  |   | 26.79 |   |  |
| <b>PF05544</b> | Proline racemase                                        | 2 | 0 |  |   | 0.28  |   |  |
| <b>PF05598</b> | Transposase domain (DUF772)                             | 3 | 0 |  |   | 0.00  | y |  |
| <b>PF05717</b> | IS66 Orf2 like protein                                  | 5 | 0 |  |   | 0.00  | y |  |
| <b>PF05954</b> | Phage late control gene D protein (GPD)                 | 1 | 0 |  |   | 0.00  | y |  |
| <b>PF05973</b> | Phage derived protein Gp49-like (DUF891)                | 1 | 0 |  |   | 0.00  |   |  |
| <b>PF05985</b> | Ethanolamine ammonia-lyase light chain (EutC)           | 1 | 0 |  |   | 0.00  |   |  |
| <b>PF05987</b> | Bacterial protein of unknown function (DUF898)          | 1 | 0 |  |   | 0.00  |   |  |
| <b>PF05988</b> | Bacterial protein of unknown function (DUF899)          | 4 | 0 |  |   | 0.00  | y |  |
| <b>PF06055</b> | Exopolysaccharide synthesis, ExoD                       | 1 | 0 |  |   | 0.00  |   |  |
| <b>PF06057</b> | Bacterial virulence protein (VirJ)                      | 1 | 0 |  |   | 90.35 | y |  |
| <b>PF06165</b> | Glycosyltransferase family 36                           | 1 | 0 |  |   | 0.00  |   |  |
| <b>PF06169</b> | Protein of unknown function (DUF982)                    | 9 | 0 |  | y | 0.00  |   |  |
| <b>PF06187</b> | Protein of unknown function (DUF993)                    | 1 | 0 |  |   | 0.00  |   |  |
| <b>PF06204</b> | Putative carbohydrate binding domain                    | 1 | 0 |  |   | 0.00  |   |  |
| <b>PF06205</b> | Glycosyltransferase 36 associated family                | 1 | 0 |  |   | 0.00  |   |  |
| <b>PF06267</b> | Family of unknown function (DUF1028)                    | 1 | 0 |  |   | 13.04 |   |  |
| <b>PF06276</b> | Ferric iron reductase FhuF-like transporter             | 1 | 0 |  |   | 0.00  | y |  |
| <b>PF06283</b> | Trehalose utilisation                                   | 2 | 0 |  |   | 0.00  |   |  |
| <b>PF06314</b> | Acetoacetate decarboxylase (ADC)                        | 1 | 0 |  |   | 0.00  | y |  |
| <b>PF06455</b> | NADH dehydrogenase subunit 5 C-terminus                 | 1 | 0 |  |   | 0.00  |   |  |

|                |                                                    |   |   |  |   |       |   |  |
|----------------|----------------------------------------------------|---|---|--|---|-------|---|--|
| <b>PF06481</b> | COX Aromatic Rich Motif                            | 1 | 0 |  |   | 1.01  |   |  |
| <b>PF06537</b> | Protein of unknown function (DUF1111)              | 1 | 0 |  |   | 69.57 |   |  |
| <b>PF06719</b> | AraC-type transcriptional regulator N-terminus     | 2 | 0 |  |   | 0.62  |   |  |
| <b>PF06745</b> | KaiC                                               | 1 | 0 |  |   | 0.00  |   |  |
| <b>PF06779</b> | Protein of unknown function (DUF1228)              | 1 | 0 |  |   | 0.00  |   |  |
| <b>PF06906</b> | Protein of unknown function (DUF1272)              | 1 | 0 |  |   | 0.00  |   |  |
| <b>PF06964</b> | Alpha-L-arabinofuranosidase C-terminus             | 1 | 0 |  |   | 0.00  |   |  |
| <b>PF07005</b> | Protein of unknown function, DUF1537               | 3 | 0 |  |   | 0.00  |   |  |
| <b>PF07040</b> | Protein of unknown function (DUF1326)              | 1 | 0 |  |   | 0.00  | y |  |
| <b>PF07081</b> | Protein of unknown function (DUF1349)              | 1 | 0 |  |   | 0.00  |   |  |
| <b>PF07171</b> | MlrC C-terminus                                    | 2 | 0 |  |   | 0.00  |   |  |
| <b>PF07221</b> | N-acylglucosamine 2-epimerase (GlcNAc 2-epimerase) | 1 | 0 |  |   | 0.00  |   |  |
| <b>PF07228</b> | Stage II sporulation protein E (SpoIIIE)           | 1 | 0 |  |   | 0.00  | y |  |
| <b>PF07364</b> | Protein of unknown function (DUF1485)              | 2 | 0 |  |   | 0.00  |   |  |
| <b>PF07366</b> | SnoL-like polyketide cyclase                       | 2 | 0 |  |   | 8.50  | y |  |
| <b>PF07433</b> | Protein of unknown function (DUF1513)              | 1 | 0 |  |   | 34.58 |   |  |
| <b>PF07506</b> | RepB plasmid partitioning protein                  | 4 | 0 |  |   | 0.00  |   |  |
| <b>PF07582</b> | AP endonuclease family 2 C terminus                | 1 | 0 |  |   | 0.00  |   |  |
| <b>PF07704</b> | Rv0623-like transcription factor                   | 1 | 0 |  |   | 0.00  |   |  |
| <b>PF07756</b> | Protein of unknown function (DUF1612)              | 1 | 0 |  | y | 0.00  |   |  |
| <b>PF07786</b> | Protein of unknown function (DUF1624)              | 1 | 0 |  |   | 0.00  | y |  |
| <b>PF07804</b> | HipA-like C-terminal domain                        | 2 | 0 |  |   | 0.36  |   |  |
| <b>PF07805</b> | HipA-like N-terminal domain                        | 1 | 0 |  |   | 0.36  |   |  |
| <b>PF07812</b> | TfuA-like protein                                  | 1 | 0 |  | y | 0.00  | y |  |
| <b>PF07848</b> | PaaX-like protein                                  | 1 | 0 |  |   | 0.00  | y |  |
| <b>PF07876</b> | Stress responsive A/B Barrel Domain                | 2 | 0 |  |   | 0.00  | y |  |
| <b>PF07931</b> | Chloramphenicol phosphotransferase-like protein    | 1 | 0 |  |   | 0.00  |   |  |
| <b>PF08002</b> | Protein of unknown function (DUF1697)              | 2 | 0 |  |   | 0.00  | y |  |
| <b>PF08009</b> | CDP-alcohol phosphatidyltransferase 2              | 1 | 0 |  |   | 0.00  |   |  |
| <b>PF08021</b> | Siderophore-interacting FAD-binding domain         | 1 | 0 |  |   | 0.00  | y |  |
| <b>PF08125</b> | Mannitol dehydrogenase C-terminal domain           | 2 | 0 |  |   | 0.00  |   |  |
| <b>PF08223</b> | PaaX-like protein C-terminal domain                | 1 | 0 |  |   | 0.00  | y |  |
| <b>PF08269</b> | Cache domain                                       | 3 | 0 |  |   | 7.85  |   |  |
| <b>PF08291</b> | Peptidase M15                                      | 1 | 0 |  |   | 58.72 |   |  |
| <b>PF08362</b> | YcdC-like protein, C-terminal region               | 1 | 0 |  |   | 0.00  |   |  |
| <b>PF08388</b> | Group II intron, maturase-specific domain          | 1 | 0 |  |   | 0.00  | y |  |
| <b>PF08410</b> | Domain of unknown function (DUF1737)               | 1 | 0 |  |   | 0.00  |   |  |
| <b>PF08421</b> | Putative zinc binding domain                       | 1 | 0 |  |   | 0.00  | y |  |
| <b>PF08479</b> | POTRA domain, ShlB-type                            | 1 | 0 |  |   | 58.64 |   |  |

|                |                                                            |   |   |  |   |        |   |  |
|----------------|------------------------------------------------------------|---|---|--|---|--------|---|--|
| <b>PF08483</b> | IstB-like ATP binding N-terminal                           | 1 | 0 |  |   | 0.00   |   |  |
| <b>PF08484</b> | C-methyltransferase C-terminal domain                      | 1 | 0 |  |   | 0.00   | y |  |
| <b>PF08530</b> | X-Pro dipeptidyl-peptidase C-terminal non-catalytic domain | 1 | 0 |  |   | 1.66   | y |  |
| <b>PF08532</b> | Beta-galactosidase trimerisation domain                    | 1 | 0 |  |   | 0.00   | y |  |
| <b>PF08548</b> | Peptidase M10 serralyisin C terminal                       | 1 | 0 |  |   | 0.00   | y |  |
| <b>PF08592</b> | Domain of unknown function (DUF1772)                       | 1 | 0 |  |   | 0.00   | y |  |
| <b>PF08681</b> | Protein of unknown function (DUF1778)                      | 1 | 0 |  |   | 0.00   | y |  |
| <b>PF08734</b> | GYD domain                                                 | 2 | 0 |  |   | 0.00   |   |  |
| <b>PF09130</b> | Domain of unknown function (DUF1932)                       | 1 | 0 |  |   | 0.00   |   |  |
| <b>PF09209</b> | Domain of unknown function (DUF1956)                       | 1 | 0 |  |   | 0.00   | y |  |
| <b>PF09347</b> | Domain of unknown function (DUF1989)                       | 1 | 0 |  |   | 0.00   | y |  |
| <b>PF09363</b> | XFP C-terminal domain                                      | 1 | 0 |  |   | 0.00   | y |  |
| <b>PF09383</b> | NIL domain                                                 | 1 | 0 |  |   | 0.00   | y |  |
| <b>PF09391</b> | Protein of unknown function (DUF2000)                      | 1 | 0 |  |   | 0.00   |   |  |
| <b>PF09411</b> | Lipid A 3-O-deacylase (PagL)                               | 1 | 0 |  |   | 72.73  |   |  |
| <b>PF09604</b> | F subunit of K+-transporting ATPase (Potass_KdpF)          | 1 | 0 |  |   | 0.00   |   |  |
| <b>PF09678</b> | Cytochrome c oxidase caa3 assembly factor (Caa3_CtaG)      | 1 | 0 |  |   | 22.64  | y |  |
| <b>PF09828</b> | Chromate resistance exported protein                       | 1 | 0 |  |   | 0.00   |   |  |
| <b>PF09863</b> | Uncharacterized protein conserved in bacteria (DUF2090)    | 1 | 0 |  |   | 0.00   |   |  |
| <b>PF09864</b> | Membrane-bound lysozyme-inhibitor of c-type lysozyme       | 1 | 0 |  |   | 57.61  |   |  |
| <b>PF09924</b> | Uncharacterized conserved protein (DUF2156)                | 1 | 0 |  |   | 0.00   | y |  |
| <b>PF09929</b> | Uncharacterized conserved protein (DUF2161)                | 1 | 0 |  |   | 0.00   |   |  |
| <b>PF09939</b> | Uncharacterized protein conserved in bacteria (DUF2171)    | 1 | 0 |  |   | 0.00   |   |  |
| <b>PF09972</b> | Predicted membrane protein (DUF2207)                       | 1 | 0 |  |   | 76.32  |   |  |
| <b>PF09976</b> | Tetratricopeptide repeat                                   | 1 | 0 |  |   | 0.00   |   |  |
| <b>PF09977</b> | Putative Tad-like Flp pilus-assembly                       | 1 | 0 |  |   | 0.00   |   |  |
| <b>PF09981</b> | Uncharacterized protein conserved in bacteria (DUF2218)    | 1 | 0 |  |   | 0.00   |   |  |
| <b>PF09990</b> | Predicted membrane protein (DUF2231)                       | 1 | 0 |  |   | 0.00   | y |  |
| <b>PF10000</b> | ACT domain                                                 | 1 | 0 |  |   | 0.00   |   |  |
| <b>PF10016</b> | Predicted secreted protein (DUF2259)                       | 1 | 0 |  |   | 86.87  |   |  |
| <b>PF10022</b> | Uncharacterized protein conserved in bacteria (DUF2264)    | 1 | 0 |  |   | 0.00   | y |  |
| <b>PF10025</b> | Uncharacterized conserved protein (DUF2267)                | 1 | 0 |  |   | 0.00   | y |  |
| <b>PF10048</b> | Predicted integral membrane protein (DUF2282)              | 1 | 0 |  |   | 100.00 |   |  |
| <b>PF10087</b> | Uncharacterized protein conserved in bacteria (DUF2325)    | 1 | 0 |  |   | 0.00   |   |  |
| <b>PF10091</b> | Putative glucoamylase                                      | 2 | 0 |  |   | 0.37   |   |  |
| <b>PF10115</b> | Transcriptional activator HlyU                             | 1 | 0 |  |   | 0.00   |   |  |
| <b>PF10442</b> | FIST C domain                                              | 1 | 0 |  |   | 0.00   |   |  |
| <b>PF10755</b> | Protein of unknown function (DUF2585)                      | 1 | 0 |  | y | 0.00   |   |  |
| <b>PF11294</b> | Protein of unknown function (DUF3095)                      | 1 | 0 |  |   | 0.00   |   |  |

|                |                                                |   |   |  |   |       |   |  |
|----------------|------------------------------------------------|---|---|--|---|-------|---|--|
| <b>PF11329</b> | Protein of unknown function (DUF3131)          | 1 | 0 |  |   | 1.09  |   |  |
| <b>PF11512</b> | Agrobacterium tumefaciens protein Atu4866      | 1 | 0 |  |   | 31.82 | y |  |
| <b>PF11604</b> | Copper binding periplasmic protein CusF        | 1 | 0 |  |   | 95.40 |   |  |
| <b>PF11706</b> | CGNR zinc finger                               | 1 | 0 |  |   | 0.00  | y |  |
| <b>PF11798</b> | IMS family HHH motif                           | 1 | 0 |  |   | 0.00  | y |  |
| <b>PF11800</b> | Replication protein C C-terminal region        | 3 | 0 |  | y | 0.00  |   |  |
| <b>PF11896</b> | Domain of unknown function (DUF3416)           | 1 | 0 |  |   | 0.00  |   |  |
| <b>PF11972</b> | HTH DNA binding domain                         | 1 | 0 |  | y | 0.00  |   |  |
| <b>PF11975</b> | Family 4 glycosyl hydrolase C-terminal domain  | 2 | 0 |  |   | 0.00  |   |  |
| <b>PF12200</b> | Domain of unknown function (DUF3597)           | 1 | 0 |  |   | 22.12 |   |  |
| <b>PF12411</b> | Choline sulfatase enzyme C terminal            | 1 | 0 |  |   | 0.00  |   |  |
| <b>PF12536</b> | Patatin phospholipase                          | 1 | 0 |  |   | 0.00  |   |  |
| <b>PF12708</b> | Pectate lyase superfamily protein              | 1 | 0 |  |   | 30.08 | y |  |
| <b>PF12903</b> | Protein of unknown function (DUF3830)          | 1 | 0 |  |   | 0.00  |   |  |
| <b>PF13005</b> | zinc-finger binding domain of transposase IS66 | 4 | 0 |  |   | 0.00  | y |  |
| <b>PF13007</b> | Transposase C of IS166 homeodomain             | 4 | 0 |  |   | 0.00  | y |  |
| <b>PF13087</b> | AAA domain                                     | 1 | 0 |  |   | 0.00  |   |  |
| <b>PF13088</b> | BNR repeat-like domain                         | 1 | 0 |  |   | 8.76  | y |  |
| <b>PF13230</b> | Glutamine amidotransferases class-II           | 1 | 0 |  |   | 0.00  |   |  |
| <b>PF13249</b> | Prenyltransferase-like                         | 1 | 0 |  |   | 0.00  | y |  |
| <b>PF13358</b> | DDE superfamily endonuclease                   | 4 | 0 |  |   | 0.00  | y |  |
| <b>PF13382</b> | Adenine deaminase C-terminal domain            | 2 | 0 |  |   | 0.00  |   |  |
| <b>PF13384</b> | Homeodomain-like domain                        | 1 | 0 |  |   | 0.00  | y |  |
| <b>PF13396</b> | Phospholipase_D-nuclease N-terminal            | 1 | 0 |  |   | 0.95  | y |  |
| <b>PF13452</b> | N-terminal half of MaoC dehydratase            | 1 | 0 |  |   | 0.00  | y |  |
| <b>PF13454</b> | FAD-NAD(P)-binding                             | 2 | 0 |  |   | 0.00  | y |  |
| <b>PF13488</b> | Glycine zipper                                 | 3 | 0 |  |   | 59.38 |   |  |
| <b>PF13495</b> | Phage integrase, N-terminal SAM-like domain    | 1 | 0 |  |   | 0.00  | y |  |
| <b>PF13523</b> | Acetyltransferase (GNAT) domain                | 1 | 0 |  |   | 0.00  | y |  |
| <b>PF13524</b> | Glycosyl transferases group 1                  | 3 | 0 |  |   | 0.00  | y |  |
| <b>PF13528</b> | Glycosyl transferase family 1                  | 2 | 0 |  |   | 0.49  | y |  |
| <b>PF13536</b> | Multidrug resistance efflux transporter        | 1 | 0 |  |   | 0.00  | y |  |
| <b>PF13551</b> | Winged helix-turn helix                        | 5 | 0 |  |   | 0.00  | y |  |
| <b>PF13564</b> | DoxX-like family                               | 1 | 0 |  |   | 0.00  | y |  |
| <b>PF13566</b> | Domain of unknown function (DUF4130)           | 1 | 0 |  |   | 0.00  |   |  |
| <b>PF13586</b> | Transposase DDE domain                         | 2 | 0 |  |   | 0.00  | y |  |
| <b>PF13587</b> | N-terminal domain of DJ-1_Pfpl family          | 1 | 0 |  |   | 0.47  | y |  |
| <b>PF13593</b> | SBF-like CPA transporter family (DUF4137)      | 1 | 0 |  |   | 2.44  |   |  |
| <b>PF13594</b> | Amidohydrolase                                 | 1 | 0 |  |   | 1.75  | y |  |

|                |                                                     |   |   |  |  |       |   |  |
|----------------|-----------------------------------------------------|---|---|--|--|-------|---|--|
| <b>PF13596</b> | PAS domain                                          | 1 | 0 |  |  | 0.00  | y |  |
| <b>PF13610</b> | DDE domain                                          | 1 | 0 |  |  | 0.00  | y |  |
| <b>PF13649</b> | Methyltransferase domain                            | 1 | 0 |  |  | 0.00  | y |  |
| <b>PF13672</b> | Protein phosphatase 2C                              | 1 | 0 |  |  | 0.00  |   |  |
| <b>PF13704</b> | Glycosyl transferase family 2                       | 1 | 0 |  |  | 0.00  |   |  |
| <b>PF13744</b> | Helix-turn-helix domain                             | 1 | 0 |  |  | 0.00  |   |  |
| <b>PF13751</b> | Transposase DDE domain                              | 1 | 0 |  |  | 0.18  | y |  |
| <b>PF13817</b> | IS66 C-terminal element                             | 5 | 0 |  |  | 0.00  | y |  |
| <b>PF13844</b> | Glycosyl transferase family 41                      | 1 | 0 |  |  | 0.00  |   |  |
| <b>PF14552</b> | Tautomerase enzyme                                  | 1 | 0 |  |  | 0.00  |   |  |
| <b>PF14696</b> | Hydroxyphenylpyruvate dioxygenase, HPPD, N-terminal | 2 | 0 |  |  | 0.00  | y |  |
| <b>PF14697</b> | 4Fe-4S dicluster domain                             | 1 | 0 |  |  | 0.00  | y |  |
| <b>PF14707</b> | C-terminal region of aryl-sulfatase                 | 1 | 0 |  |  | 55.95 |   |  |

*RNB median is the median gene count for the corresponding Pfam domain from 163 RNB genomes*

*NC Median is the median gene count from 69 phylogenetically related control genomes*

*Transcript induction in nodule column is derived from significant results from previous transcriptomic studies referenced in the manuscript*

*LPD is "limited phylogenetic distribution" as described in the manuscript.*

*"% total sequences with SignalP" is the proportion of sequences bearing a signal peptide motif for potential secretion*

*"Y" indicates Pfam domains used by the AntiSMASH program to predict biosynthetic clusters, highlighting putative secondary metabolite functions.*

*PID is "plant interaction determinants" as described in the manuscript.*

*Green highlights of selected cells is to draw attention to "positive control" functions involved in nodulation or nitrogen fixation*

**Supplementary Table 5. List of "enriched" Pfams based on statistical analysis of pairwise comparisons of gene counts between RNB and NC genomes.**

| "Enriched" Pfam ID<br>(based on pairwise comparisons) | Pfam Name                                                       | # of significantly different pairs | RNB Q1 (25th %) | NC Q3 (75th %) | RNB Median | NC Median |
|-------------------------------------------------------|-----------------------------------------------------------------|------------------------------------|-----------------|----------------|------------|-----------|
| PF00211                                               | Adenylate and Guanylate cyclase catalytic domain                | 7,734                              | 15              | 6              | 27         | 2         |
| PF03466                                               | LysR substrate binding domain                                   | 7,226                              | 78              | 46             | 90         | 30        |
| PF00126                                               | Bacterial regulatory helix-turn-helix protein, lysR family      | 7,105                              | 78              | 46             | 90         | 30        |
| PF13407                                               | Periplasmic binding protein domain                              | 6,995                              | 13              | 10             | 31         | 3         |
| PF00528                                               | Binding-protein-dependent transport system IM component         | 6,584                              | 126             | 120            | 175        | 62        |
| PF00356                                               | Bacterial regulatory proteins, lacI family                      | 6,020                              | 7               | 8              | 25         | 3         |
| PF13377                                               | Periplasmic binding protein-like domain                         | 5,423                              | 6               | 8              | 20         | 3         |
| PF06169                                               | Protein of unknown function (DUF982)                            | 5,310                              | 0               | 0              | 9          | 0         |
| PF01547                                               | Bacterial extracellular solute-binding protein                  | 5,133                              | 7               | 6              | 15         | 1         |
| PF00392                                               | GntR-like bacterial transcription factors                       | 5,116                              | 39              | 35             | 51         | 20        |
| PF12833                                               | Helix-turn-helix                                                | 5,073                              | 36              | 23             | 43         | 16        |
| PF01261                                               | Xylose isomerase-like TIM barrel                                | 4,812                              | 20              | 23             | 28         | 10        |
| PF08352                                               | Oligopeptide/dipeptide transporter, C-terminal region           | 4,810                              | 9               | 8              | 21         | 3         |
| PF00005                                               | ABC transporter                                                 | 4,772                              | 187             | 157            | 208        | 120       |
| PF01408                                               | Oxidoreductase family, NAD-binding Rossmann fold                | 4,718                              | 10              | 11             | 24         | 5         |
| PF07729                                               | FCD domain                                                      | 4,685                              | 27              | 25             | 35         | 13        |
| PF08402                                               | TOBE domain                                                     | 4,562                              | 17              | 18             | 32         | 8         |
| PF02653                                               | Branched-chain amino acid transport system / permease component | 4,113                              | 56              | 44             | 65         | 35        |
| PF13416                                               | Bacterial extracellular solute-binding protein                  | 4,091                              | 16              | 13             | 26         | 7         |
